# Supplementary material for: In toto light sheet fluorescence microscopy live imaging datasets of Ceratitis capitata embryonic development
Source: Springer Nature journal article supplement (doi:10.1038/s41597-022-01443-x), 2022-06-15
Supplement: MOESM1 [file 41597_2022_1443_MOESM1_ESM.pdf]

## Title

*In toto* light sheet fluorescence microscopy live imaging datasets of *Ceratitis capitata* embryonic development

## Authors

Frederic Strobl<sup>1</sup>, Marc F. Schetelig<sup>2</sup> and Ernst H.K. Stelzer<sup>1</sup>

## Affiliations

<sup>1</sup>Physical Biology / Physikalische Biologie (IZN, FB 15)  
Buchmann Institute for Molecular Life Sciences (BMLS)  
Cluster of Excellence Frankfurt – Macromolecular Complexes (CEF – MC)  
Goethe-Universität – Frankfurt am Main (Campus Riedberg)  
Max-von-Laue-Straße 15 – D-60438 Frankfurt am Main – Germany

<sup>2</sup>Justus-Liebig-Universität Gießen  
Department of Insect Biotechnology in Plant Protection  
Winchesterstraße 2 – D-35394 Gießen – Germany

Corresponding authors:

Frederic Strobl ([frederic.strobl@physikalischebiologie.de](mailto:frederic.strobl@physikalischebiologie.de))

Ernst H.K. Stelzer ([ernst.stelzer@physikalischebiologie.de](mailto:ernst.stelzer@physikalischebiologie.de))

## Table of Contents

### Supplementary Figures

- Supplementary Figure 1
- Supplementary Figure 2
- Supplementary Figure 3
- Supplementary Figure 4

### Supplementary Tables

- Supplementary Table 1
- Supplementary Table 2
- Supplementary Table 3
- Supplementary Table 4

### Supplementary Videos

- Supplementary Video 1 Caption

## Supplementary Figures

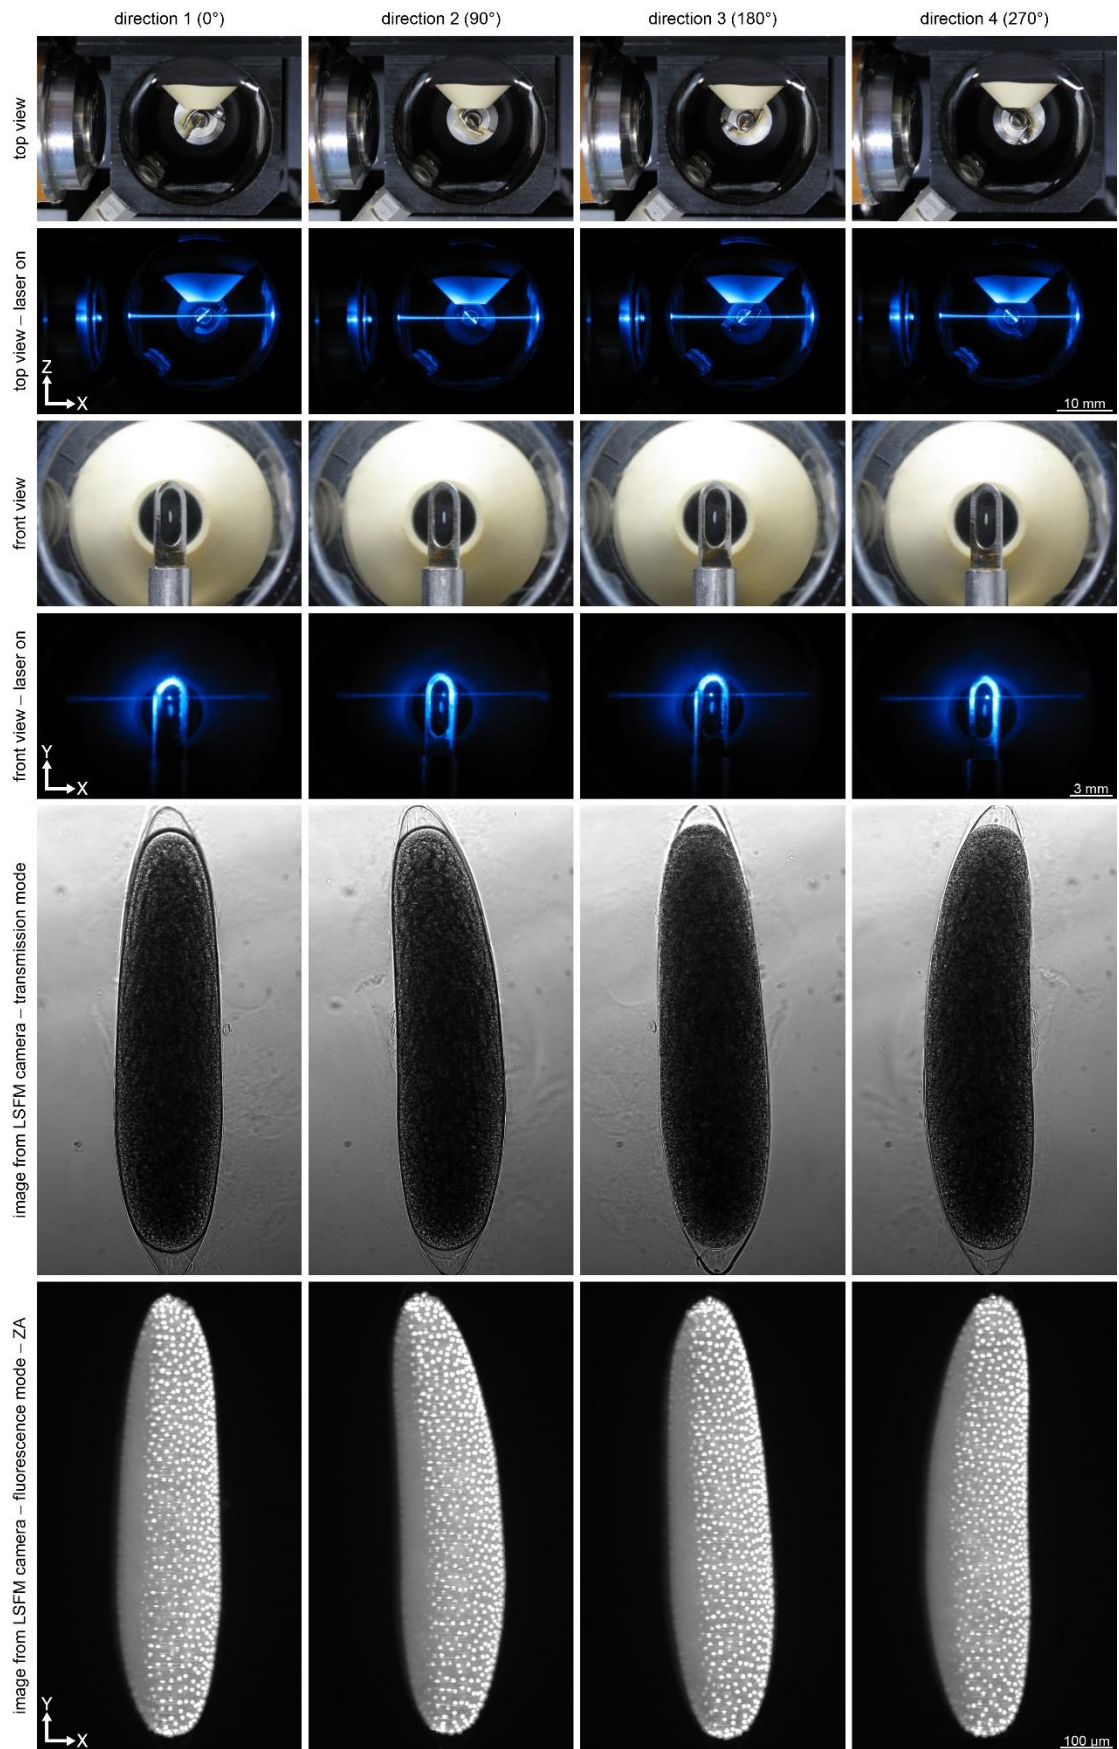

**Supplementary Figure 1 – Illustration of the medfly embryo imaging process with the cobweb holder along four directions.** Top view (first and second row) and front view (third and fourth row) of the sample chamber illustrating the illumination process along each direction. Medfly embryo imaged during blastoderm formation in the transmission light (fifth row) and fluorescence (sixth row) channels along four directions (orientations 0°, 90°, 180°, 270°). ZA, z maximum projection with image adjustment.

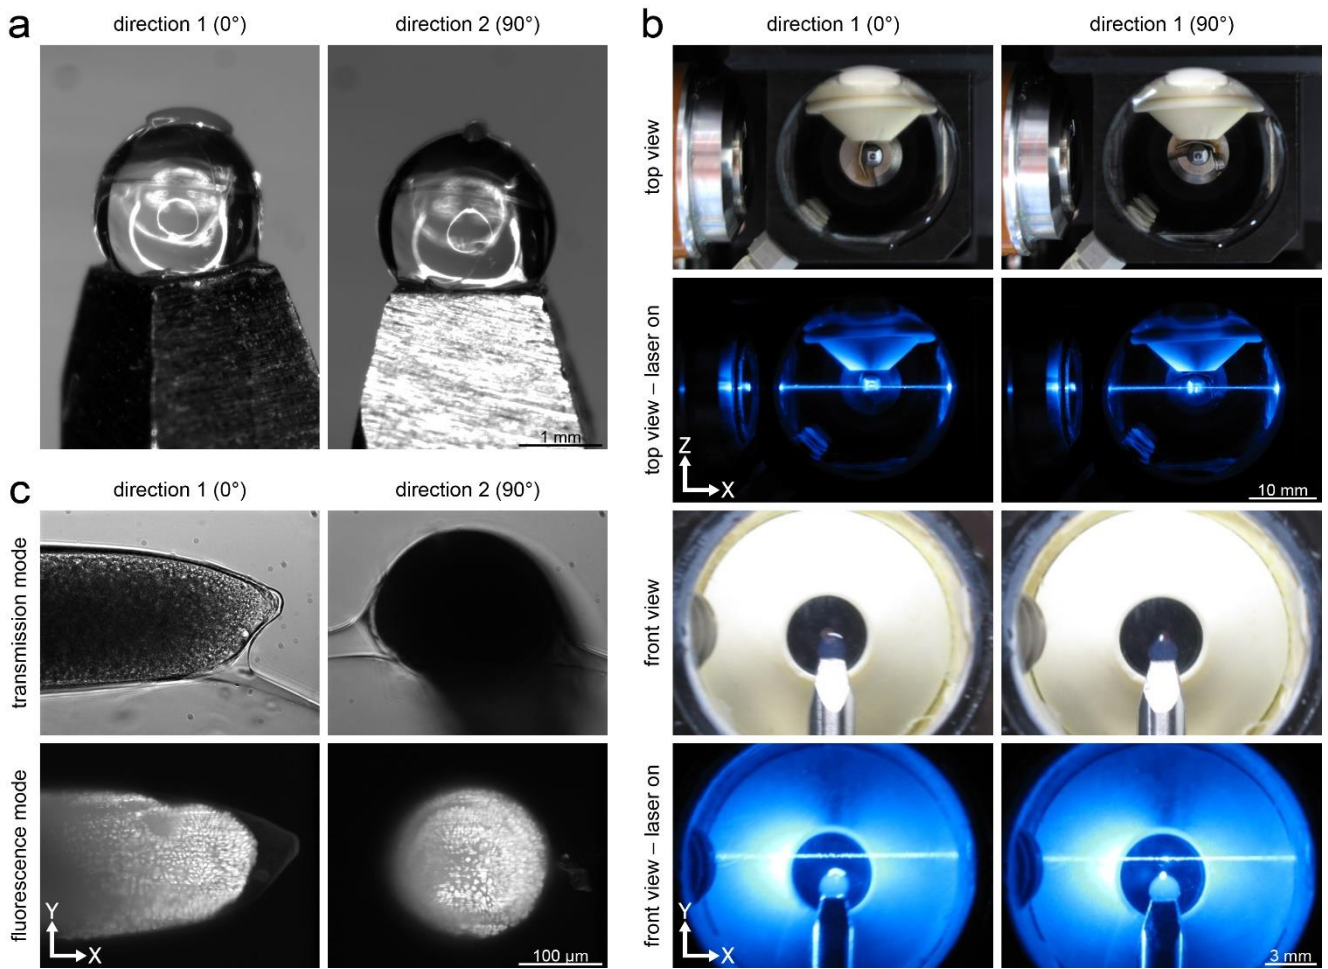

**Supplementary Figure 2 – Illustration of medfly embryo imaging process using the agarose hemisphere mounting method. (a)** Front and side view of the sample holder with embryo placed on top of the agarose hemisphere. The shown views correspond to the orientations 0° and 90°. **(b)** Top view (first and second row) and front view (third and fourth row) of the sample chamber using the alternative mounting method. **(c)** Medfly embryo imaged in the transmission light (upper row) and fluorescence channel (lower row) along two directions (orientations 0° and 90°).

a

II – Early Gastrulation

DS0001

DS0002

DS0003

DS0004

DS0005

0° (ventrolateral / ventral) – ZA

90° (dorsolateral / lateral) – ZA

180° (dorsolateral / dorsal) – ZA

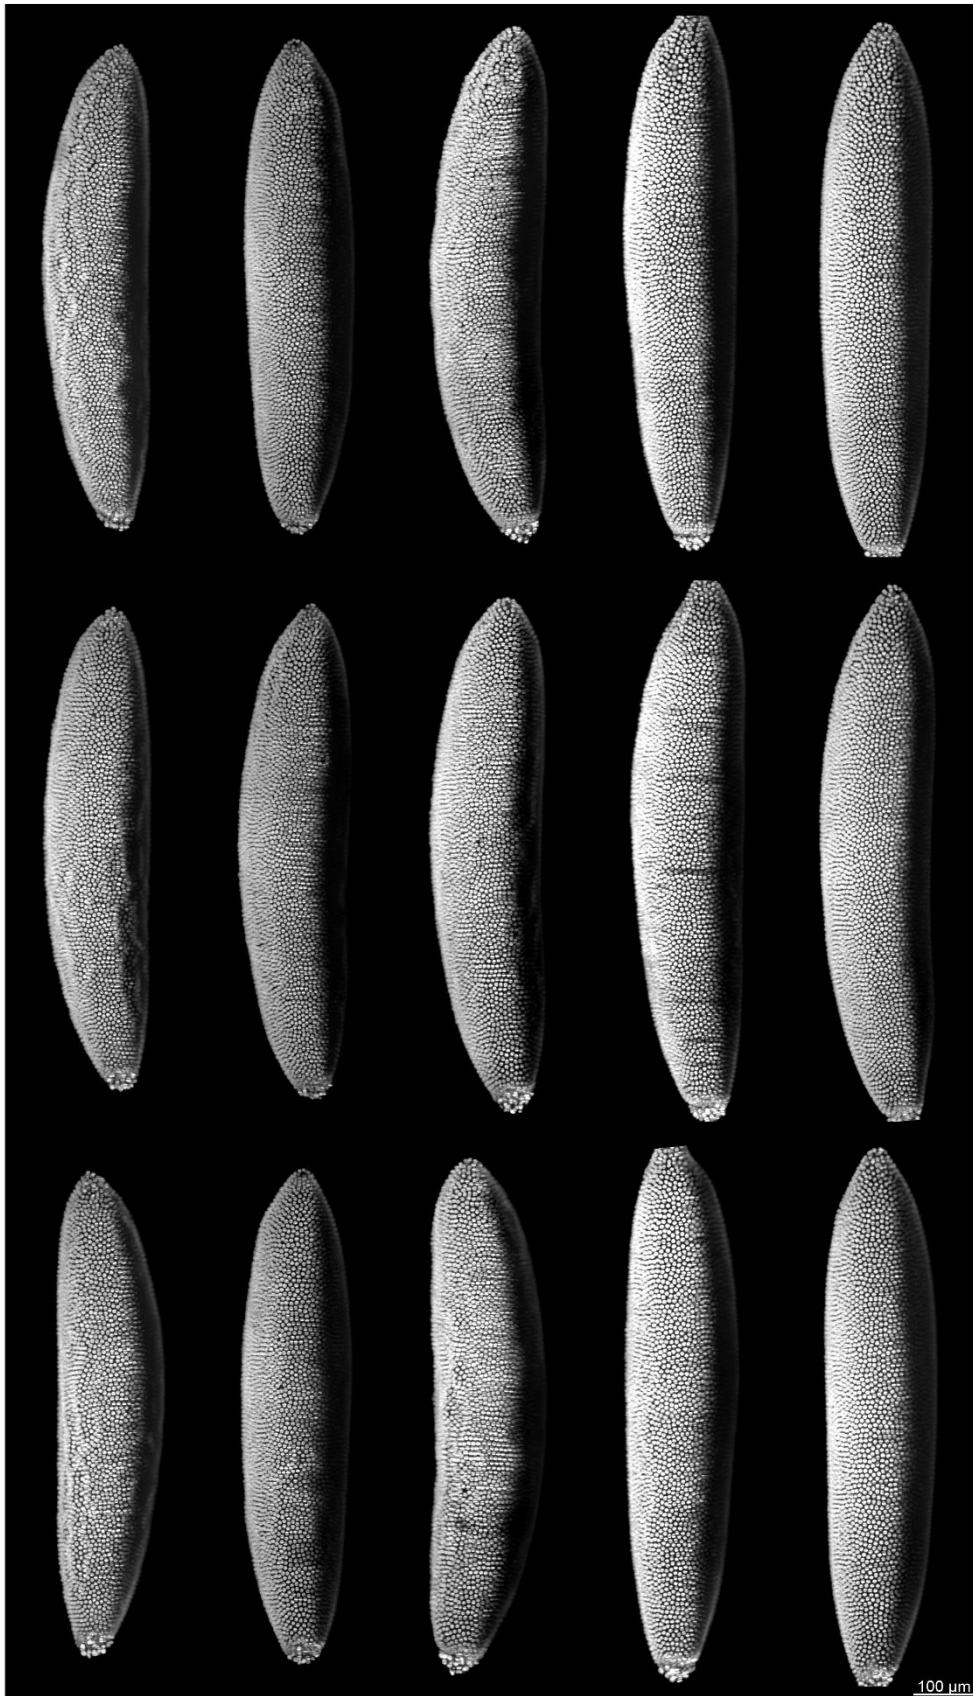

100  $\mu$ m

b

III – Germband Elongation

DS0001

DS0002

DS0003

DS0004

DS0005

0° (ventrolateral / ventral) – ZA

90° (dorsolateral / lateral) – ZA

180° (dorsolateral / dorsal) – ZA

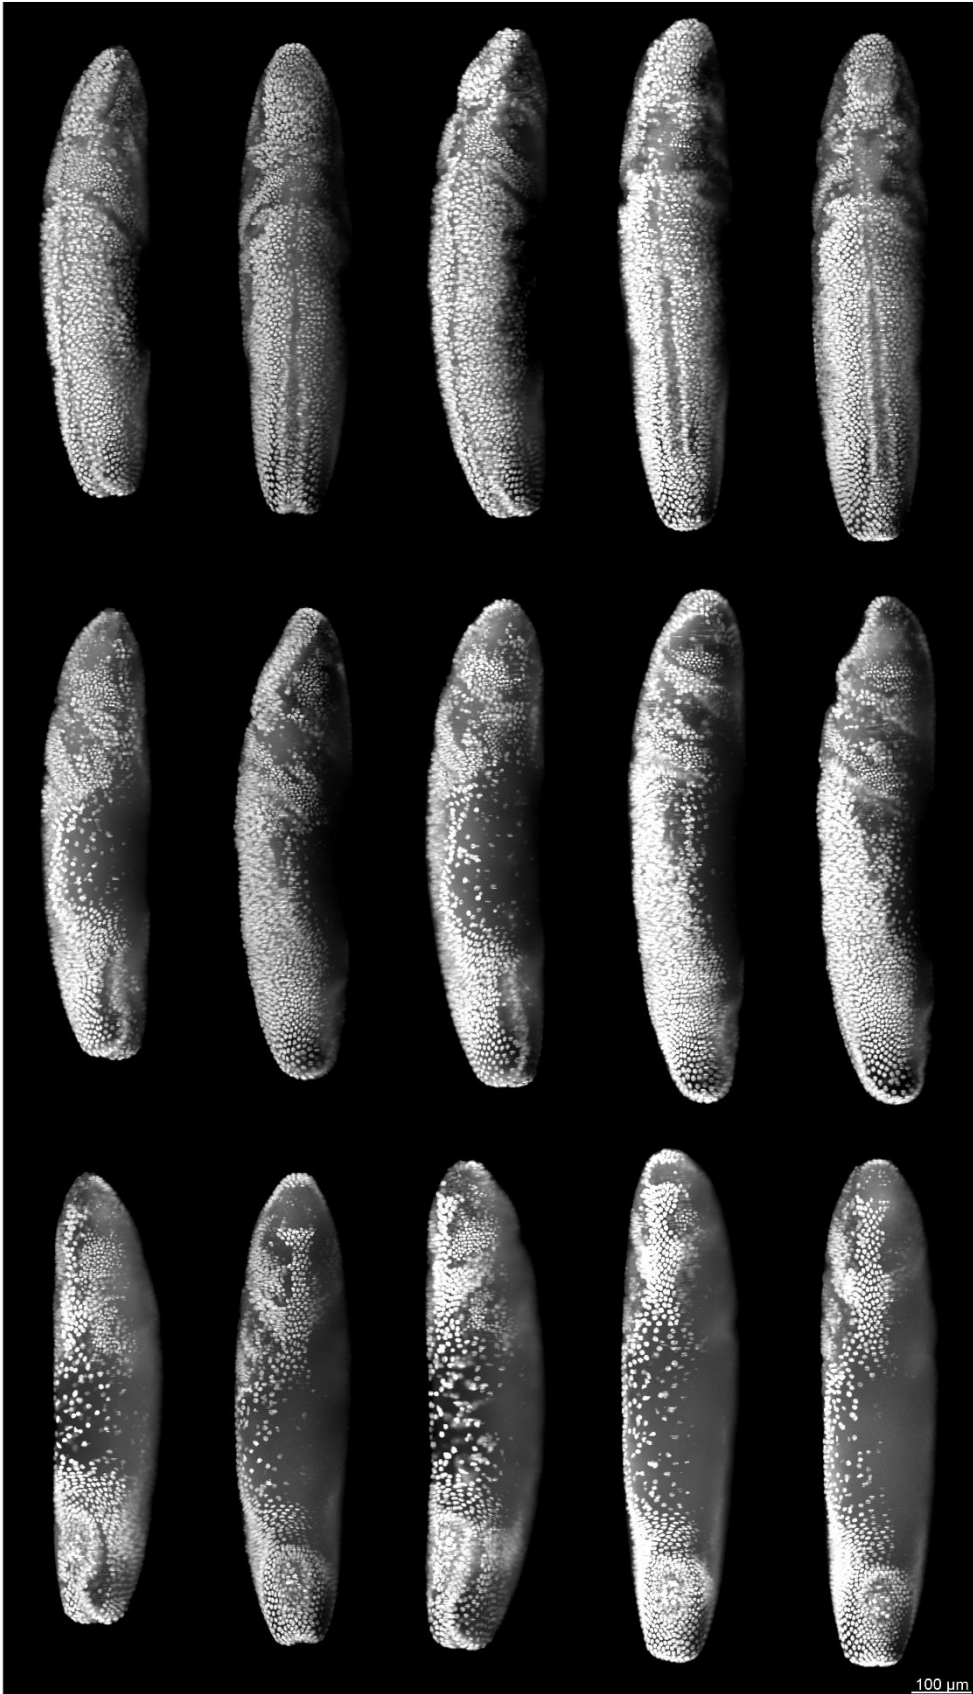

100  $\mu$ m

C

IV – Germband Retraction

DS0001

DS0002

DS0003

DS0004

DS0005

0° (ventrolateral / ventral) – ZA

90° (dorsolateral / lateral) – ZA

180° (dorsolateral / dorsal) – ZA

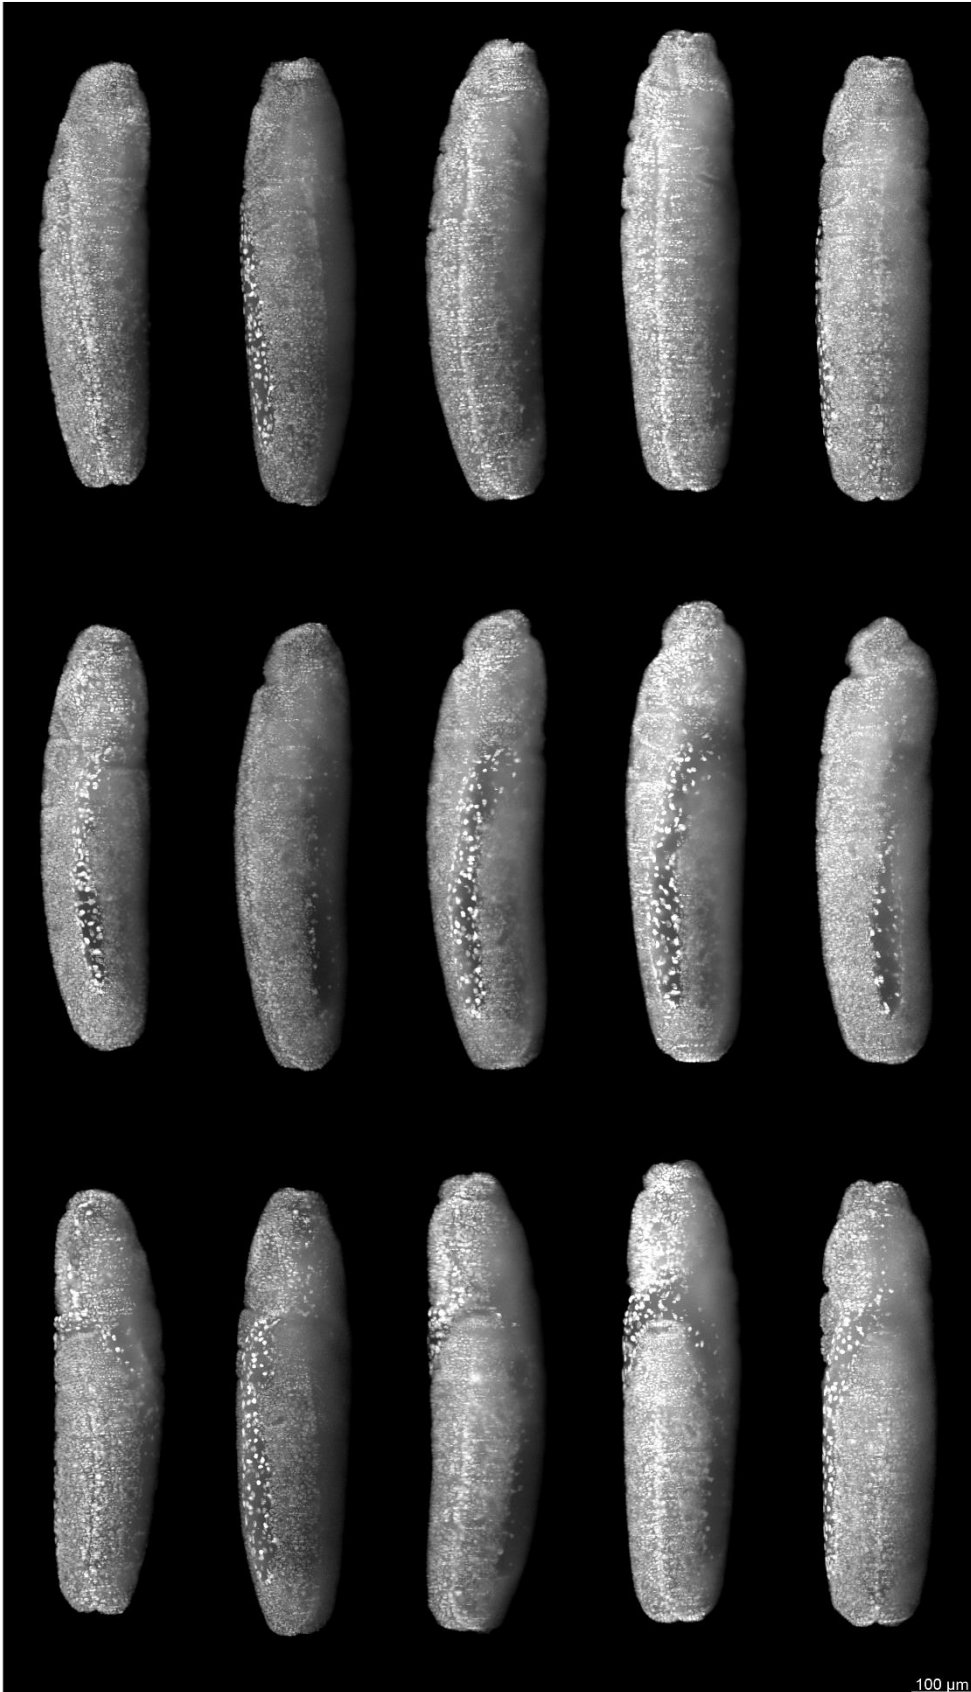

d

V – Dorsal Closure

DS0001

DS0002

DS0003

DS0004

DS0005

0° (ventrolateral / ventral) – ZA

90° (dorsolateral / lateral) – ZA

180° (dorsolateral / dorsal) – ZA

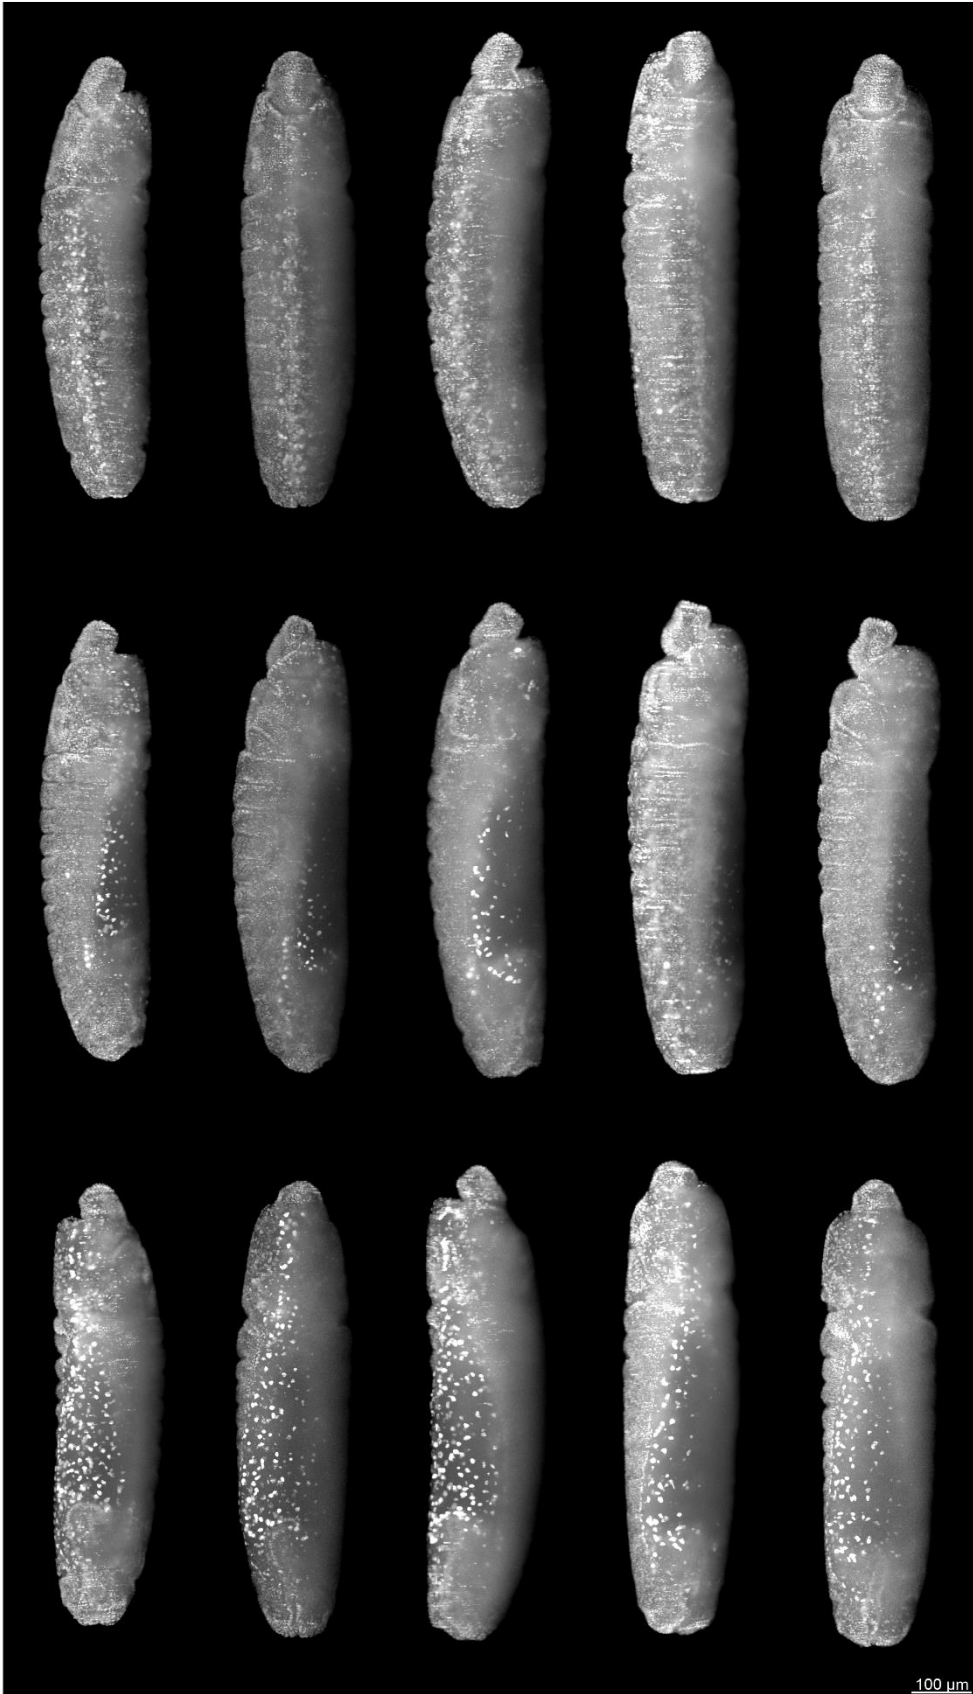

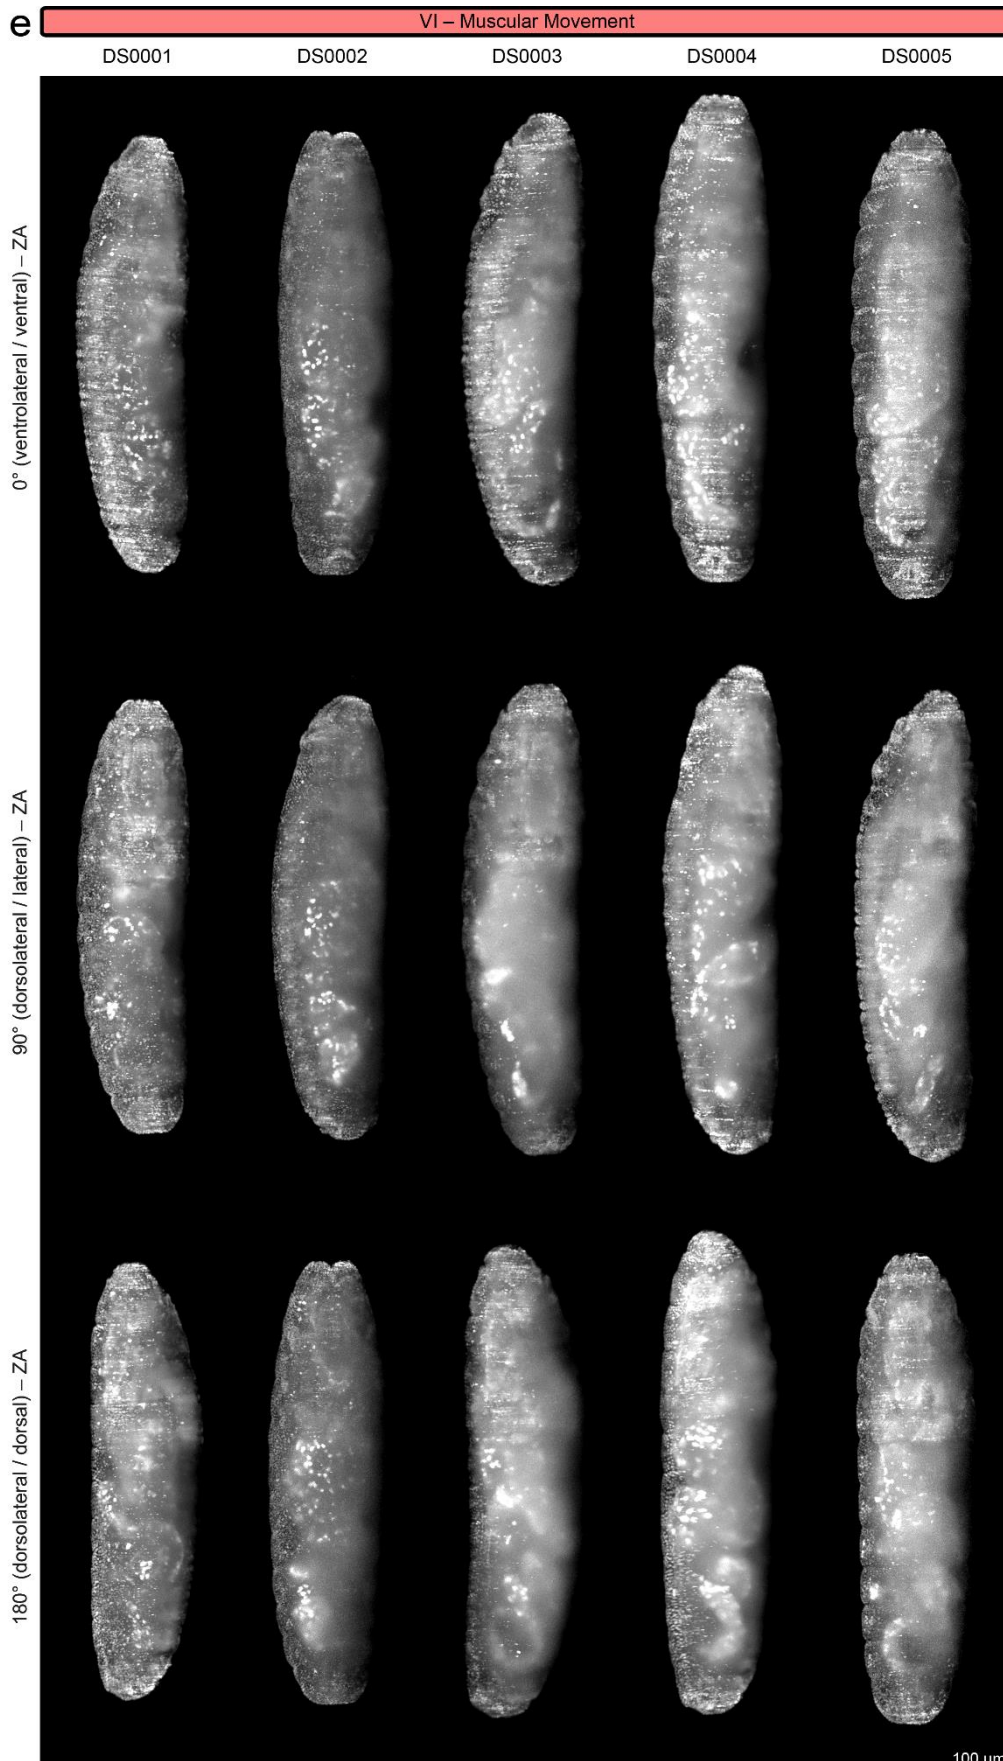

**Supplementary Figure 3 – Comparison of datasets DS0001–DS0005 at the onset of the embryogenetic events (a) early gastrulation, (b) germband elongation, (c) germband retraction, (d) dorsal closure and (e) muscular movement along three directions (orientations 0°, 90° and 180°).** Since recording started after the onset of blastoderm formation, respective image data is not available. Embryos from datasets DS0001 and DS0003 are depicted ventrolateral, dorsolateral and dorsolateral, whereas embryos from DS0002, DS0004 and DS0005 are depicted ventral, lateral and dorsal. ZA, Z maximum projection with image adjustment.



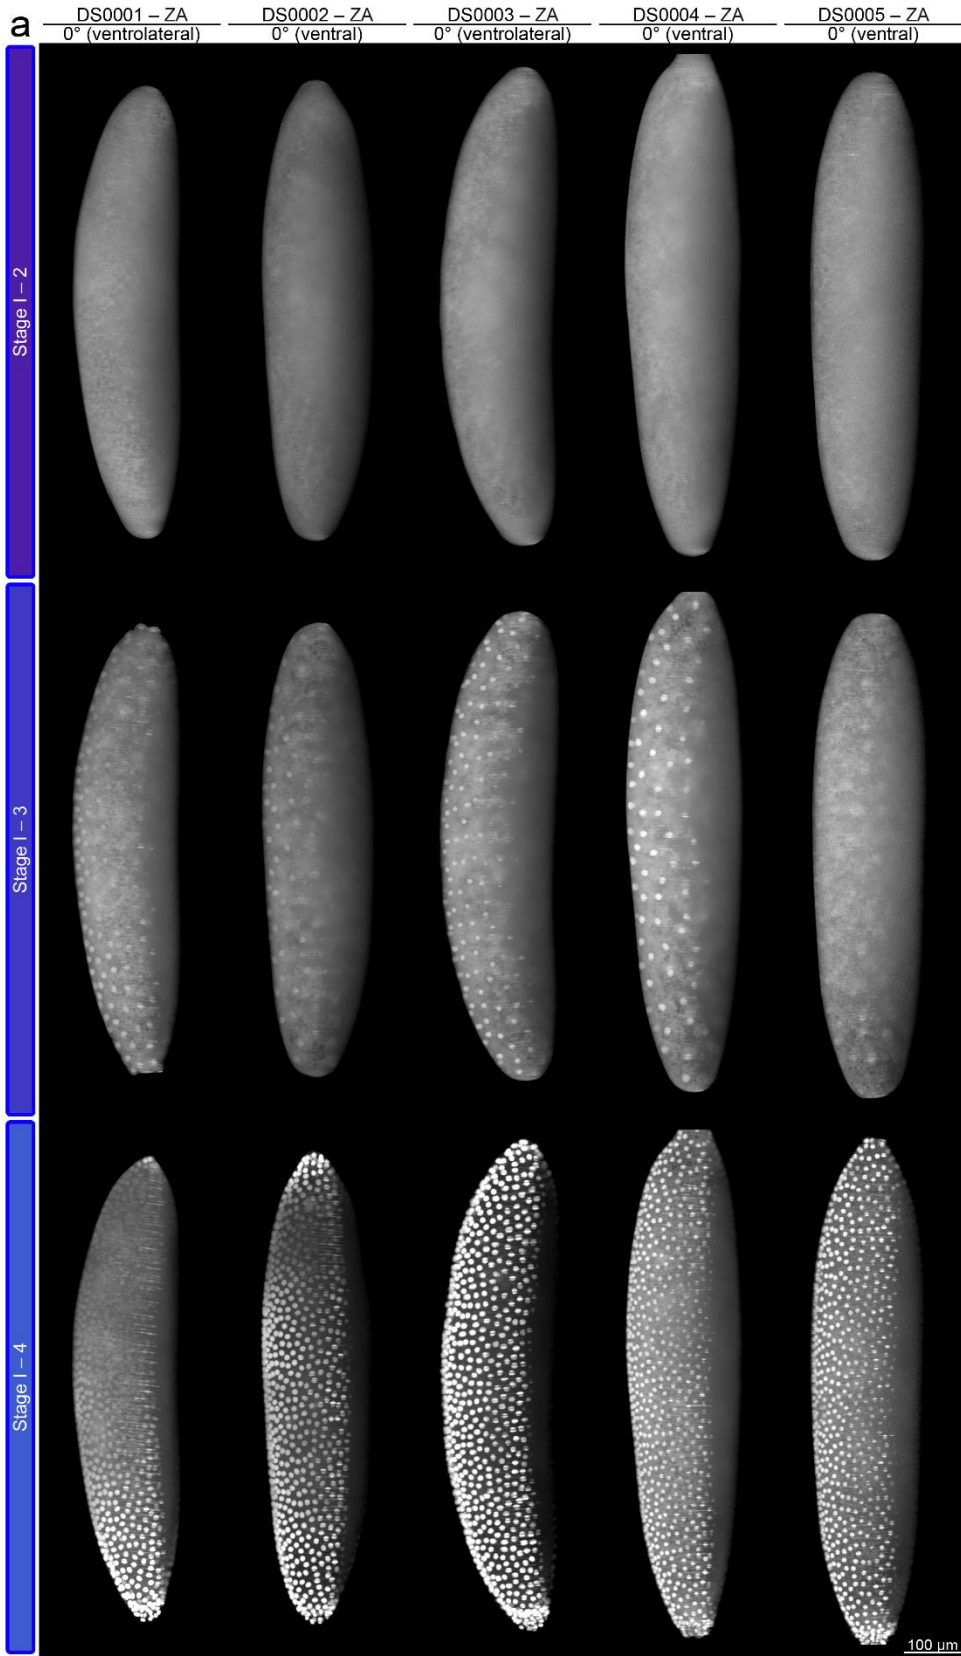

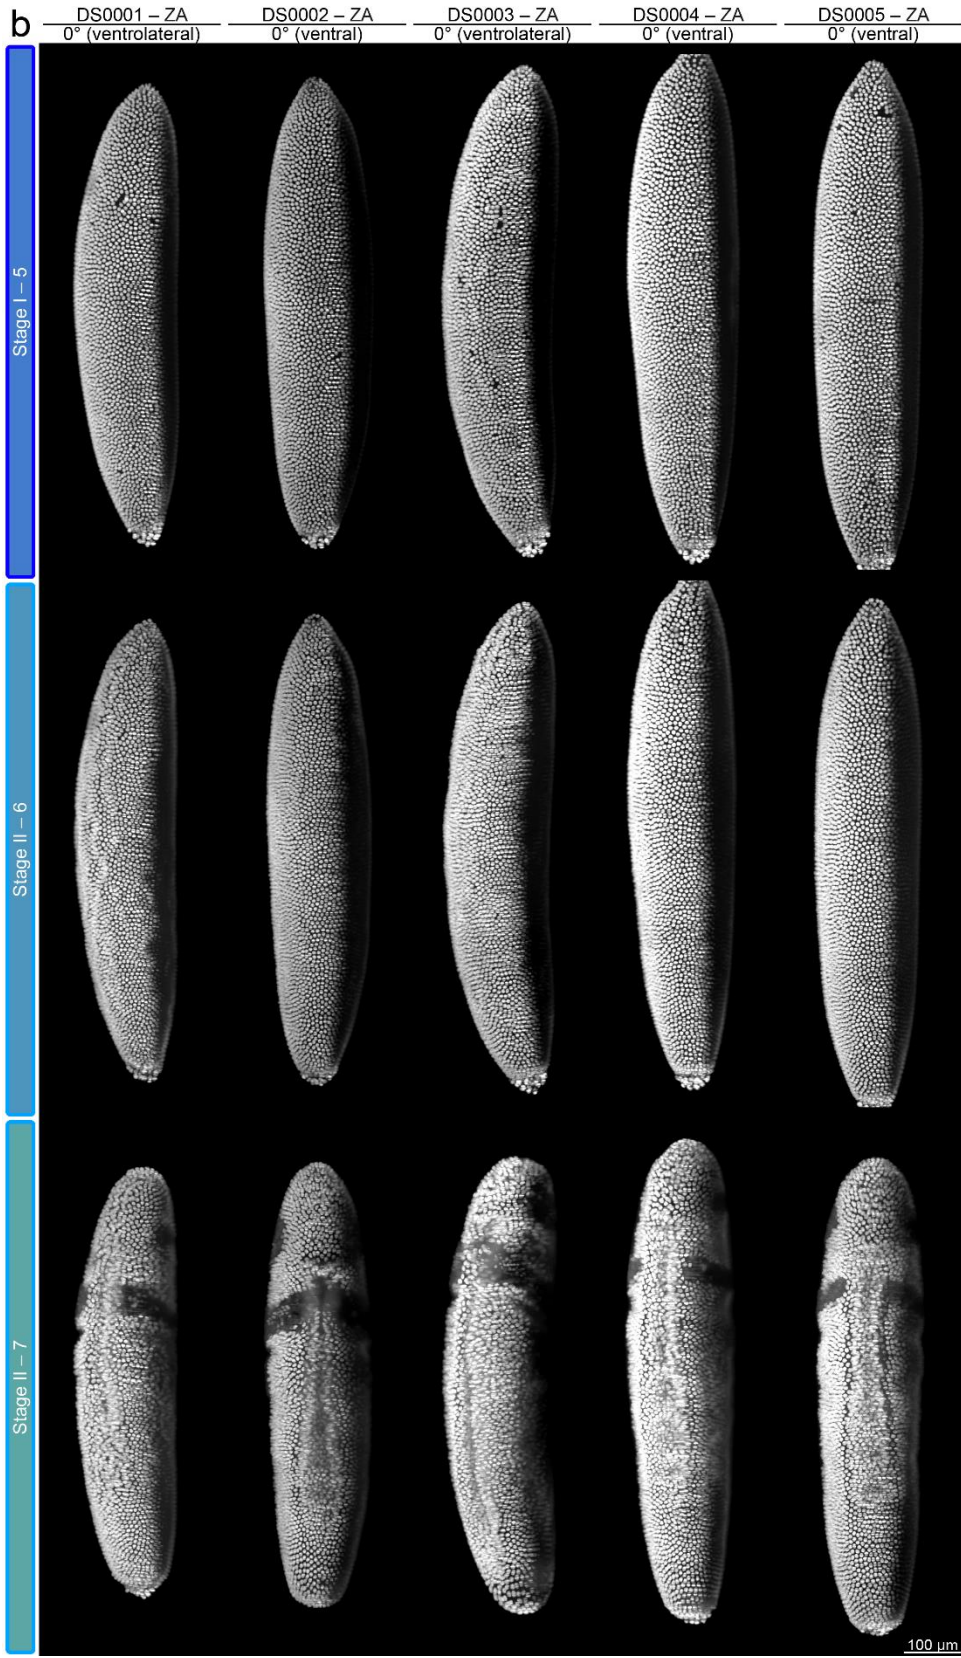

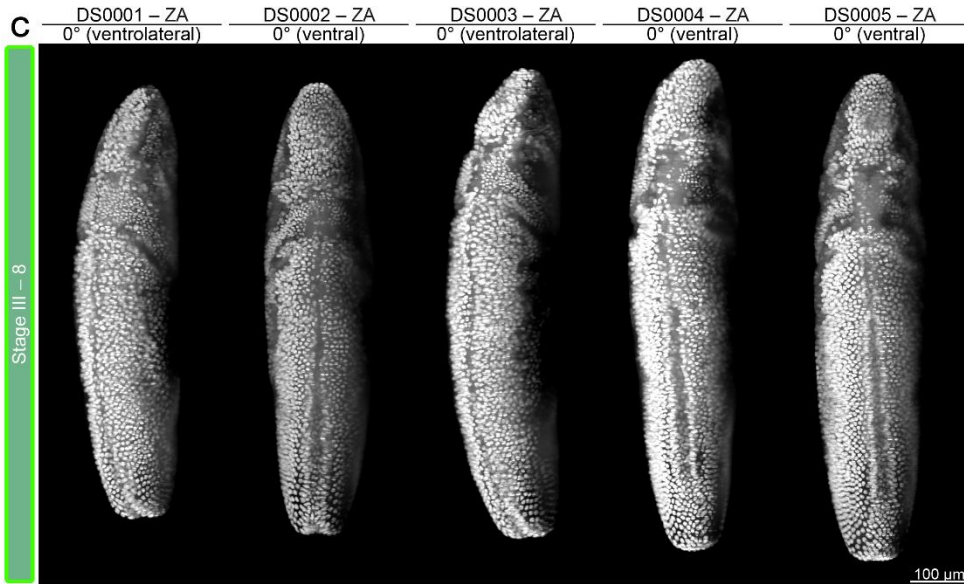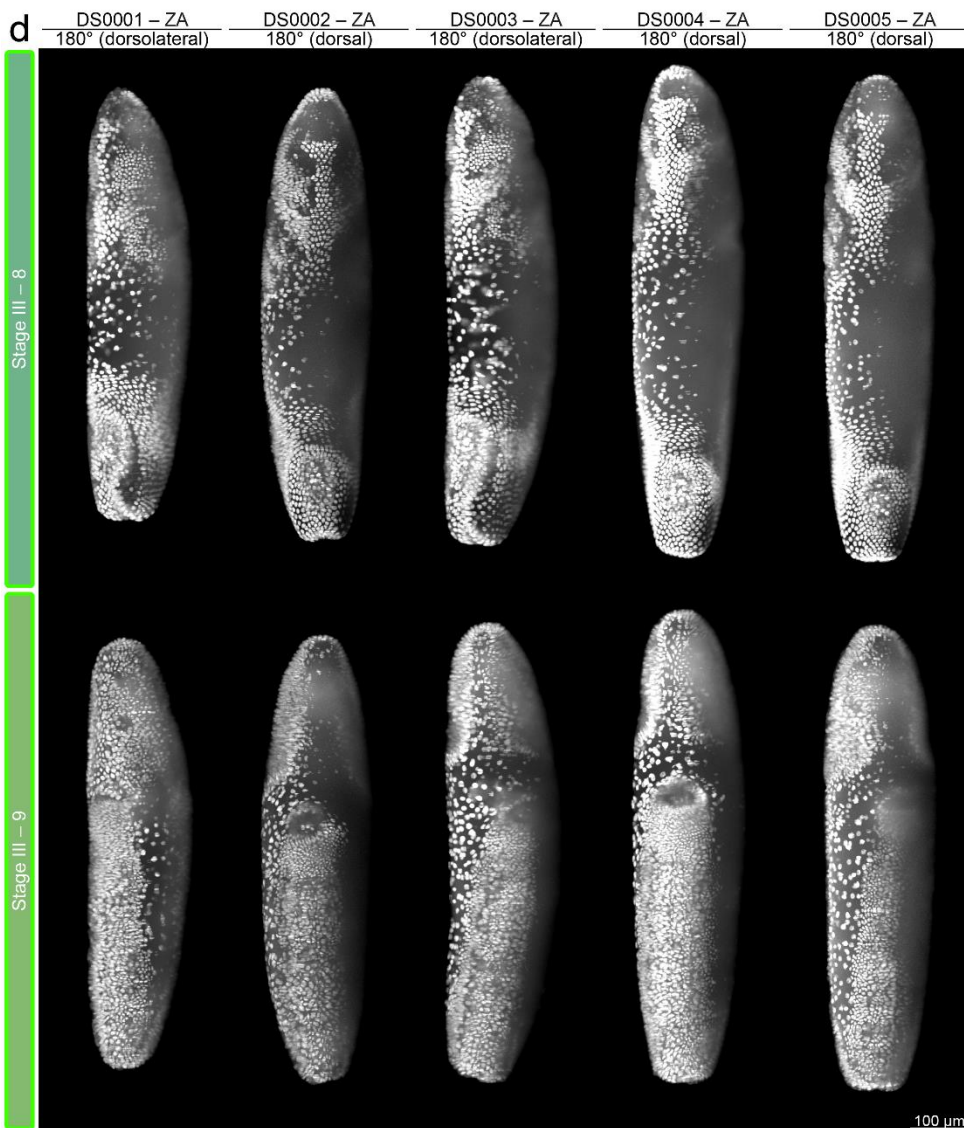

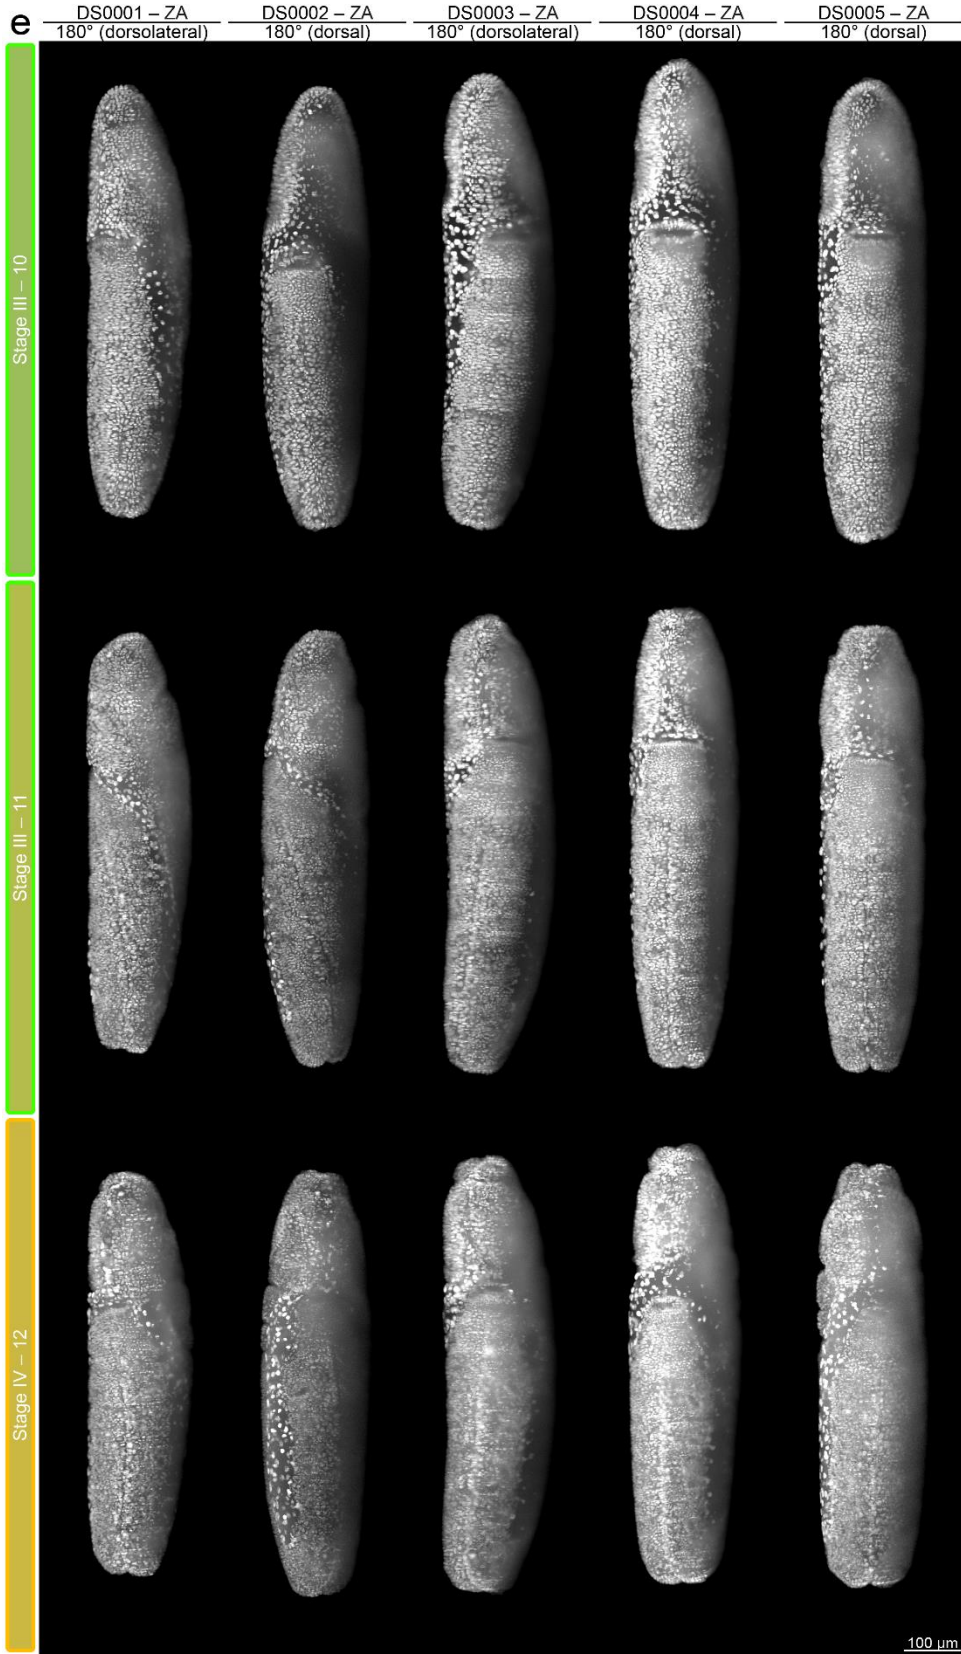

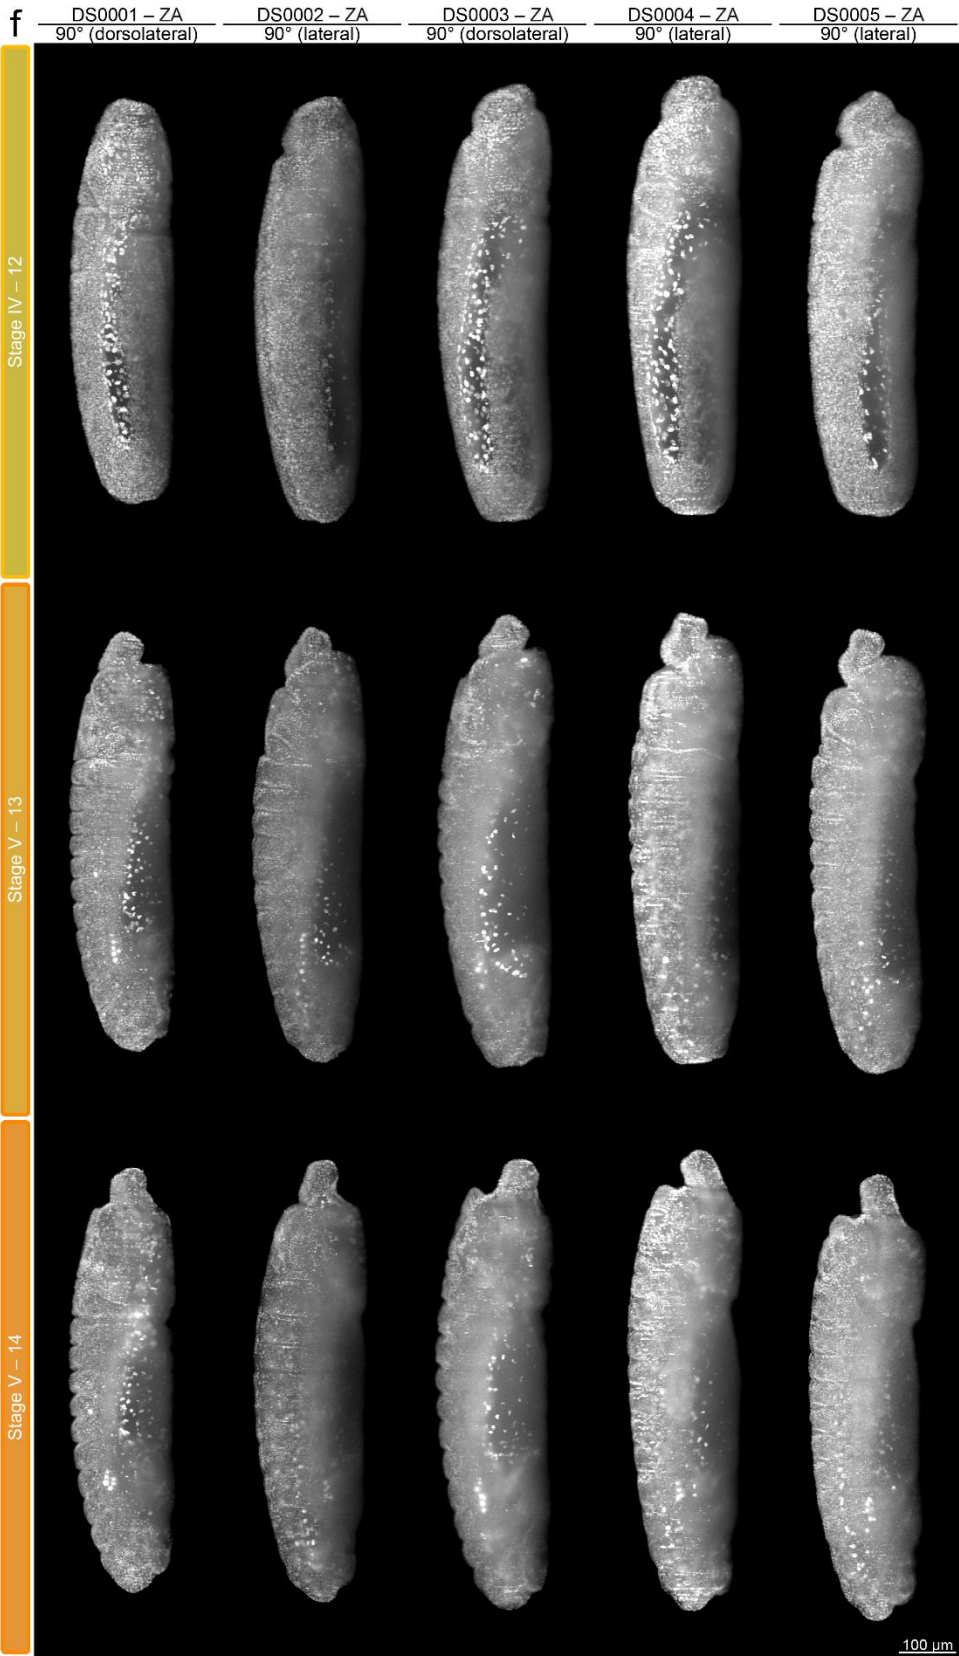

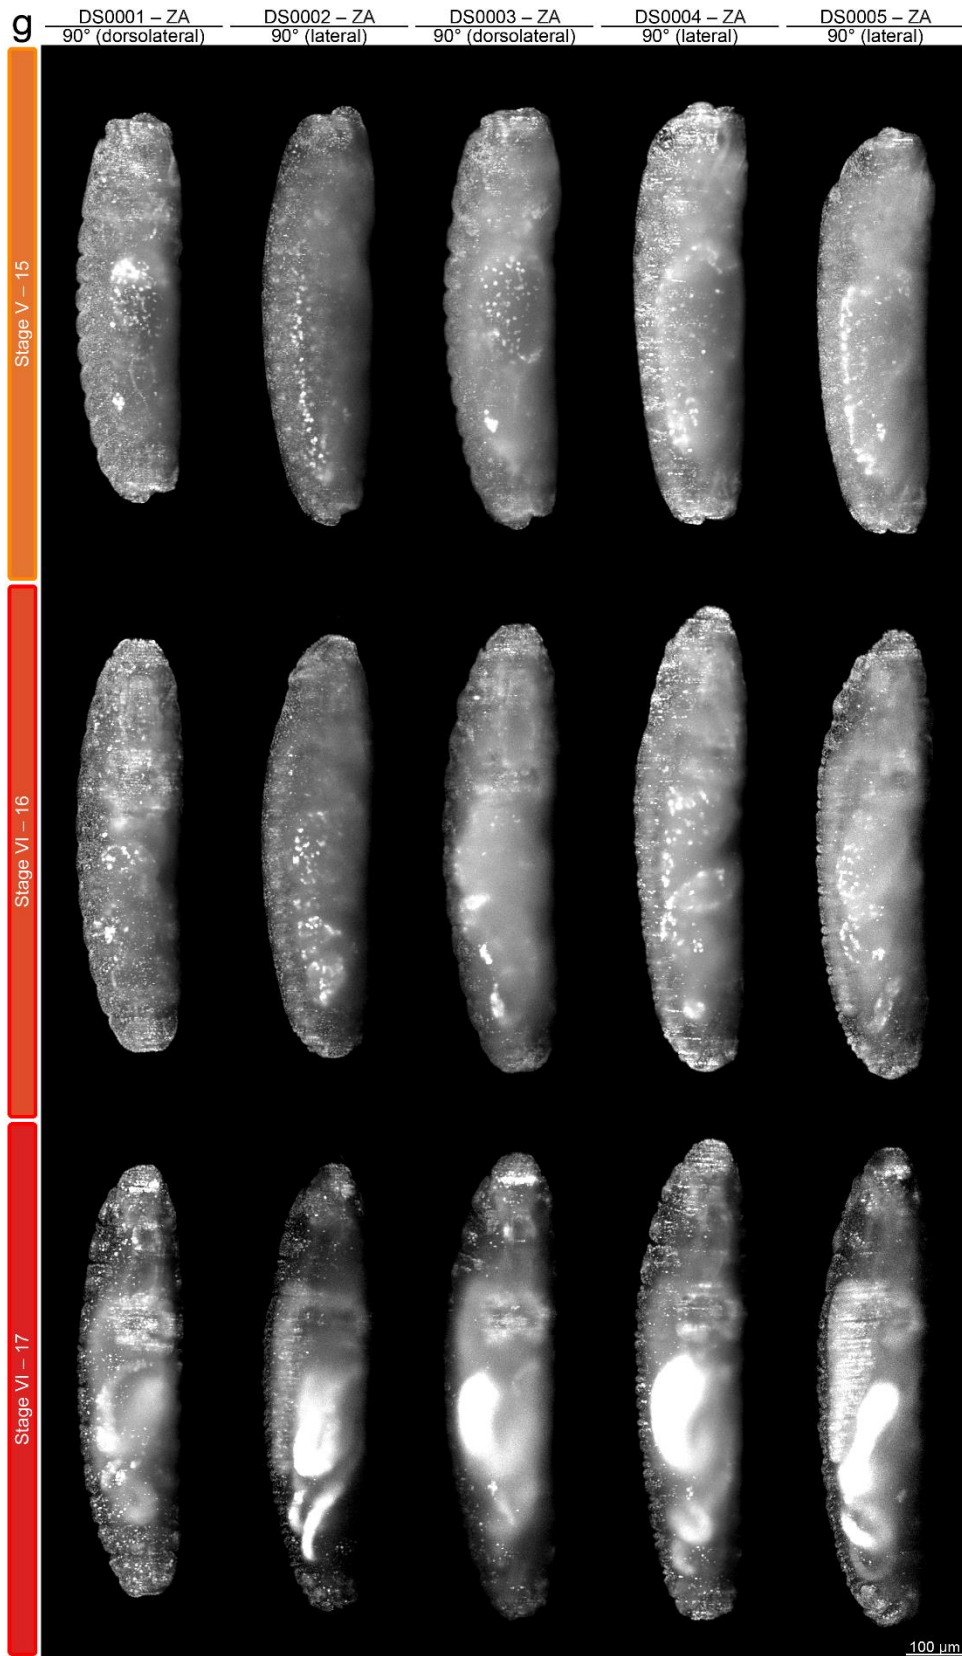

**Supplementary Figure 4 – Comparison of datasets DS0001–DS0005 at the onset of the stages (a) I-2 to I-4, (b) I-5 to II-7, (c) III-8, (d) III-8 and III-9, (e) III-10 to IV-12, (f) IV-12 to V-14, (g) V-15 to VI-17. The shown direction changes throughout the figure (at stages III-8 and IV-12), so that characteristic structures for the respective stage can be seen properly. Since the recordings started after the onset of stage I-1, respective image data is not available. Embryos from datasets DS0001 and DS0003 are depicted either ventrolateral or dorsolateral, whereas embryos from DS0002, DS0004 and DS0005 are depicted either ventral, lateral, or dorsal. ZA, z maximum projection with image adjustment.**

## Supplementary Tables

**Supplementary Table 1 – Metadata and access information for datasets DS0001–DS0009.**

| <i>Dataset (DS)</i>           | <b>DS0001</b>                                                                                                                                                                                                                                     | <b>DS0002</b>                        | <b>DS0003</b>                                               |
|-------------------------------|---------------------------------------------------------------------------------------------------------------------------------------------------------------------------------------------------------------------------------------------------|--------------------------------------|-------------------------------------------------------------|
| <i>Species</i>                | Mediterranean fruit fly (medfly) <i>Ceratitis capitata</i> (Wiedemann)<br>Arthropoda → Insecta → Diptera → Tephritidae                                                                                                                            |                                      |                                                             |
| <i>Line</i>                   | <i>TREhs43-hid<sup>Ala5</sup>_F1m2<sup>52</sup></i>                                                                                                                                                                                               |                                      |                                                             |
| <i>Line Genotype</i>          | single insertion / homozygous                                                                                                                                                                                                                     |                                      |                                                             |
| <i>Stock</i>                  | ~50-80 adults, less than 4 weeks old                                                                                                                                                                                                              |                                      |                                                             |
| <i>Stock Medium</i>           | refined sugar (524973, REWE Markt GmbH, Köln, Germany)<br>supplemented with 33% (wt/wt) inactive dry yeast (62-106, Flystuff, San Diego, CA, USA)                                                                                                 |                                      |                                                             |
| <i>Stock Conditions</i>       | 12:00 h light / 12:00 h darkness at 25°C and 70% relative humidity<br>(DR-36VL, Percival Scientific, Perry, IA, USA)                                                                                                                              |                                      |                                                             |
| <i>Embryo Collection</i>      | cultures were given 10 min at room temperature (23±1°C) to lay embryos                                                                                                                                                                            |                                      |                                                             |
| <i>Pre-Imaging Incubation</i> | embryo mounting procedure, approximately 00:30 h at room temperature (23±1°C),<br>incubation in the sample chamber, approximately 01:30 h at room temperature (23±1°C)<br>resulting in a total of 02:00 h incubation at room temperature (23±1°C) |                                      |                                                             |
| <i>LSFM Implementation</i>    | sample chamber-based digital scanned laser light sheet fluorescence microscope (DSL <sup>3</sup> )                                                                                                                                                |                                      |                                                             |
| <i>Laser Lines</i>            | 488 nm / 60 mW Diode Laser<br>(PhoxX 488-60, Omicron-Laserage Laserprodukte GmbH, Rodgau-Dudenhofen, Germany)                                                                                                                                     |                                      |                                                             |
| <i>Excitation Objective</i>   | 2.5× NA 0.06 EC Epiplan-Neofluar objective (422320-9900-000, Carl Zeiss, Göttingen, Germany)                                                                                                                                                      |                                      |                                                             |
| <i>Emission Objective</i>     | 10× NA 0.3 W N-Achroplan objective (420947-9900-000, Carl Zeiss, Göttingen, Germany)                                                                                                                                                              |                                      |                                                             |
| <i>Emission Filters</i>       | 525/50 single-band bandpass filter<br>(FF03-525/50-25, Semrock/AHF Analysentechnik AG, Tübingen, Germany)                                                                                                                                         |                                      |                                                             |
| <i>Camera</i>                 | high-resolution CCD (Clara, Andor, Belfast, United Kingdom), 14 bit, 1040×1392 pixel (pitch 6.45 μm)                                                                                                                                              |                                      |                                                             |
| <i>Dataset File Type</i>      | TIFF, 16-bit grayscale (planes saved as z stacks in ZIP-compressed container files, indicated as PL(ZS))                                                                                                                                          |                                      |                                                             |
| <i>Dechoriation</i>           | 90 s in a 1:9 mixture of<br>~10% (vol/vol) sodium hypochlorite (425044-250ML, Sigma Aldrich, Taufkirchen, Germany)<br>and PBS pH 7.4 (10010-023, Gibco Life Technologies GmbH, Darmstadt, Germany)                                                |                                      |                                                             |
| <i>Mounting Method</i>        | cobweb holder mounting method (embryos are attached to a thin agarose film spanning a slotted hole) <sup>50</sup>                                                                                                                                 |                                      |                                                             |
| <i>Mounting Agarose</i>       | 1% (wt/vol) low-melt agarose (6351.2, Carl Roth, Karlsruhe, Germany)<br>in PBS pH 7.4 (10010-023, Gibco Life Technologies GmbH, Darmstadt, Germany)                                                                                               |                                      |                                                             |
| <i>Imaging Buffer</i>         | PBS pH 7.4 (10010-023, Gibco Life Technologies GmbH, Darmstadt, Germany)                                                                                                                                                                          |                                      |                                                             |
| <i>Imaging Temperature</i>    | room temperature (23±1°C)                                                                                                                                                                                                                         | room temperature (23±1°C)            | room temperature (23±1°C)                                   |
| <i>Viewing Perspective</i>    | ventrolateral, dorsolateral,<br>dorsolateral, ventrolateral                                                                                                                                                                                       | ventral, lateral,<br>dorsal, lateral | ventrolateral, dorsolateral,<br>dorsolateral, ventrolateral |
| <i>Developmental Stages</i>   | II-2 to VI-17                                                                                                                                                                                                                                     | II-2 to VI-17                        | II-2 to VI-17                                               |
| <i>Retrieval</i>              | developed to healthy adult                                                                                                                                                                                                                        | developed to healthy adult           | developed to healthy adult                                  |

(continued)

| <i>Dataset (DS)</i>                                      | <b>DS0001</b>                                        | <b>DS0002</b>                           | <b>DS0003</b>                         |
|----------------------------------------------------------|------------------------------------------------------|-----------------------------------------|---------------------------------------|
| <i>Dataset Size</i>                                      | 31.1 Gigabyte                                        | 31.6 Gigabyte                           | 31.9 Gigabyte                         |
| <i>Dataset Access</i>                                    | DOI: 10.5281/zenodo.6448019                          | DOI: 10.5281/zenodo.6448433             | DOI: 10.5281/zenodo.6450798           |
| <i>Figures</i>                                           | 2 (first column)                                     | 2 (second column)                       | 2 (third column)                      |
| <i>Supplementary Figures</i>                             | 3 (first column),<br>4 (first column)                | 3 (second column),<br>4 (second column) | 3 (third column),<br>4 (third column) |
| <i>Supplementary Videos</i>                              | 1 (first column, first)                              | 1 (first column, second row)            | 1 (first column third row)            |
| <i>Comment</i>                                           | median development time<br>of datasets DS0001–DS0005 | -                                       | -                                     |
| <i>Time Points (TP)</i>                                  | <b>121 (TP0001-TP0121)</b>                           | <b>126 (TP0001-TP0126)</b>              | <b>122 (TP0001-TP0122)</b>            |
| <i>TP Interval</i>                                       | 30 min                                               | 30 min                                  | 30 min                                |
| <i>Total Time</i><br>( $(TP-1) \times TP$ Interval)      | 60:00 h                                              | 62:30 h                                 | 60:30 h                               |
| <i>Directions (DR)</i>                                   | <b>4 (DR0001-DR0004)</b>                             | <b>4 (DR0001-DR0004)</b>                | <b>4 (DR0001-DR0004)</b>              |
| <i>DR Orientations</i>                                   | 0°, 90°, 180°, 270°                                  | 0°, 90°, 180°, 270°                     | 0°, 90°, 180°, 270°                   |
| <i>Channels (CH)</i>                                     | <b>1 (CH0001)</b>                                    | <b>1 (CH0001)</b>                       | <b>1 (CH0001)</b>                     |
| <i>CH0001 Excitation</i>                                 | 488 nm                                               | 488 nm                                  | 488 nm                                |
| <i>CH0001 Power</i>                                      | 135 $\mu$ W (close to the embryo)                    | 135 $\mu$ W (close to the embryo)       | 135 $\mu$ W (close to the embryo)     |
| <i>CH0001 Exposure Time</i>                              | 50 ms                                                | 50 ms                                   | 50 ms                                 |
| <i>CH0001 Emission Filter</i>                            | 525/50 single-band<br>bandpass filter                | 525/50 single-band<br>bandpass filter   | 525/50 single-band<br>bandpass filter |
| <i>CH0001 Theoretical<br/>Lateral / Axial Resolution</i> | ~850 nm / ~3,200 nm                                  | ~850 nm / ~3,200 nm                     | ~850 nm / ~3,200 nm                   |
| <i>Planes (PL)</i>                                       | <b>100 (PL0001-PL0100)</b>                           | <b>100 (PL0001-PL0100)</b>              | <b>100 (PL0001-PL0100)</b>            |
| <i>Z Spacing</i>                                         | 2.58 $\mu$ m                                         | 2.58 $\mu$ m                            | 2.58 $\mu$ m                          |
| <i>Z Distance</i><br>( $PL \times Z$ Spacing)            | 258.0 $\mu$ m                                        | 258.0 $\mu$ m                           | 258.0 $\mu$ m                         |
| <i>X-Dimensions (XD)</i>                                 | <b>500 pixels</b>                                    | <b>500 pixels</b>                       | <b>500 pixels</b>                     |
| <i>X Spacing</i>                                         | 0.645 $\mu$ m                                        | 0.645 $\mu$ m                           | 0.645 $\mu$ m                         |
| <i>X Length</i><br>( $XD \times X$ Spacing)              | 322.5 $\mu$ m                                        | 322.5 $\mu$ m                           | 322.5 $\mu$ m                         |
| <i>Y-Dimensions (YD)</i>                                 | <b>1390 pixels</b>                                   | <b>1390 pixels</b>                      | <b>1390 pixels</b>                    |
| <i>Y Spacing</i>                                         | 0.645 $\mu$ m                                        | 0.645 $\mu$ m                           | 0.645 $\mu$ m                         |
| <i>Y Length</i><br>( $YD \times Y$ Spacing)              | 896.6 $\mu$ m                                        | 896.6 $\mu$ m                           | 896.6 $\mu$ m                         |



(continued)

| <i>Dataset (DS)</i>           | <b>DS0004</b>                                                                                                                                                                                                                                     | <b>DS0005</b>                        | <b>DS0006</b>                                               |
|-------------------------------|---------------------------------------------------------------------------------------------------------------------------------------------------------------------------------------------------------------------------------------------------|--------------------------------------|-------------------------------------------------------------|
| <i>Species</i>                | Mediterranean fruit fly (medfly) <i>Ceratitis capitata</i> (Wiedemann)<br>Arthropoda → Insecta → Diptera → Tephritidae                                                                                                                            |                                      |                                                             |
| <i>Line</i>                   | <i>TREhs43-hid<sup>Ala5</sup>_F1m2<sup>52</sup></i>                                                                                                                                                                                               |                                      |                                                             |
| <i>Line Genotype</i>          | single insertion / homozygous                                                                                                                                                                                                                     |                                      |                                                             |
| <i>Stock</i>                  | ~50-80 adults, less than 4 weeks old                                                                                                                                                                                                              |                                      |                                                             |
| <i>Stock Medium</i>           | refined sugar (524973, REWE Markt GmbH, Köln, Germany)<br>supplemented with 33% (wt/wt) inactive dry yeast (62-106, Flystuff, San Diego, CA, USA)                                                                                                 |                                      |                                                             |
| <i>Stock Conditions</i>       | 12:00 h light / 12:00 h darkness at 25°C and 70% relative humidity<br>(DR-36VL, Percival Scientific, Perry, IA, USA)                                                                                                                              |                                      |                                                             |
| <i>Embryo Collection</i>      | cultures were given 10 min at room temperature (23±1°C) to lay embryos                                                                                                                                                                            |                                      |                                                             |
| <i>Pre-Imaging Incubation</i> | embryo mounting procedure, approximately 00:30 h at room temperature (23±1°C),<br>incubation in the sample chamber, approximately 01:30 h at room temperature (23±1°C)<br>resulting in a total of 02:00 h incubation at room temperature (23±1°C) |                                      |                                                             |
| <i>LSFM Implementation</i>    | sample chamber-based digital scanned laser light sheet fluorescence microscope (DSLMS) <sup>3</sup>                                                                                                                                               |                                      |                                                             |
| <i>Laser Lines</i>            | 488 nm / 60 mW Diode Laser<br>(PhoxX 488-60, Omicron-Laserage Laserprodukte GmbH, Rodgau-Dudenhofen, Germany)                                                                                                                                     |                                      |                                                             |
| <i>Excitation Objective</i>   | 2.5× NA 0.06 EC Epiplan-Neofluar objective (422320-9900-000, Carl Zeiss, Göttingen, Germany)                                                                                                                                                      |                                      |                                                             |
| <i>Emission Objective</i>     | 10× NA 0.3 W N-Achroplan objective (420947-9900-000, Carl Zeiss, Göttingen, Germany)                                                                                                                                                              |                                      |                                                             |
| <i>Emission Filters</i>       | 525/50 single-band bandpass filter<br>(FF03-525/50-25, Semrock/AHF Analysentechnik AG, Tübingen, Germany)                                                                                                                                         |                                      |                                                             |
| <i>Camera</i>                 | high-resolution CCD (Clara, Andor, Belfast, United Kingdom), 14 bit, 1040×1392 pixel (pitch 6.45 μm)                                                                                                                                              |                                      |                                                             |
| <i>Dataset File Type</i>      | TIFF, 16-bit grayscale (planes saved as z stacks in ZIP-compressed container files, indicated as PL(ZS))                                                                                                                                          |                                      |                                                             |
| <i>Dechoriation</i>           | 90 s in a 1:9 mixture of<br>~10% (vol/vol) sodium hypochlorite (425044-250ML, Sigma Aldrich, Taufkirchen, Germany)<br>and PBS pH 7.4 (10010-023, Gibco Life Technologies GmbH, Darmstadt, Germany)                                                |                                      |                                                             |
| <i>Mounting Method</i>        | cobweb holder mounting method (embryos are attached to a thin agarose film spanning a slotted hole) <sup>50</sup>                                                                                                                                 |                                      |                                                             |
| <i>Mounting Agarose</i>       | 1% (wt/vol) low-melt agarose (6351.2, Carl Roth, Karlsruhe, Germany)<br>in PBS pH 7.4 (10010-023, Gibco Life Technologies GmbH, Darmstadt, Germany)                                                                                               |                                      |                                                             |
| <i>Imaging Buffer</i>         | PBS pH 7.4 (10010-023, Gibco Life Technologies GmbH, Darmstadt, Germany)                                                                                                                                                                          |                                      |                                                             |
| <i>Imaging Temperature</i>    | room temperature (23±1°C)                                                                                                                                                                                                                         | room temperature (23±1°C)            | room temperature (23±1°C)                                   |
| <i>Viewing Perspective</i>    | ventral, lateral,<br>dorsal, lateral                                                                                                                                                                                                              | ventral, lateral,<br>dorsal, lateral | ventrolateral, dorsolateral,<br>dorsolateral, ventrolateral |
| <i>Developmental Stages</i>   | II-2 to VI-17                                                                                                                                                                                                                                     | II-2 to VI-17                        | II-2 to VI-17                                               |
| <i>Retrieval</i>              | developed to healthy adult                                                                                                                                                                                                                        | developed to healthy adult           | did not eclose from the pupa                                |

(continued)

| <i>Dataset (DS)</i>                                      | <b>DS0004</b>                                      | <b>DS0005</b>                                      | <b>DS0006</b>                         |
|----------------------------------------------------------|----------------------------------------------------|----------------------------------------------------|---------------------------------------|
| <i>Dataset Size</i>                                      | 31.5 Gigabyte                                      | 28.9 Gigabyte                                      | 28.1 Gigabyte                         |
| <i>Dataset Access</i>                                    | DOI: 10.5281/zenodo.6451099                        | DOI: 10.5281/zenodo.6453980                        | DOI: 10.5281/zenodo.6455038           |
| <i>Figures</i>                                           | 2 (fourth column)                                  | 2 (fifth column)                                   | -                                     |
| <i>Supplementary Figures</i>                             | 3 (fourth column),<br>4 (fourth column)            | 3 (fifth column),<br>4 (fifth column)              | -                                     |
| <i>Supplementary Videos</i>                              | 1 (second column, first row)                       | 1 (second column, second row)                      | 1 (second column, third row)          |
| <i>Comment</i>                                           | slightly larger than<br>the volume of view along y | slightly larger than<br>the volume of view along y | excluded<br>from analysis             |
| <b><i>Time Points (TP)</i></b>                           | <b>116 (TP0001-TP0116)</b>                         | <b>115 (TP0001-TP0115)</b>                         | <b>113 (TP0001-TP0113)</b>            |
| <i>TP Interval</i>                                       | 30 min                                             | 30 min                                             | 30 min                                |
| <i>Total Time</i><br>( $(TP-1) \times TP$ Interval)      | 57:30 h                                            | 57:00 h                                            | 56:00 h                               |
| <b><i>Directions (DR)</i></b>                            | <b>4 (DR0001-DR0004)</b>                           | <b>4 (DR0001-DR0004)</b>                           | <b>4 (DR0001-DR0004)</b>              |
| <i>DR Orientations</i>                                   | 0°, 90°, 180°, 270°                                | 0°, 90°, 180°, 270°                                | 0°, 90°, 180°, 270°                   |
| <b><i>Channels (CH)</i></b>                              | <b>1 (CH0001)</b>                                  | <b>1 (CH0001)</b>                                  | <b>1 (CH0001)</b>                     |
| <i>CH0001 Excitation</i>                                 | 488 nm                                             | 488 nm                                             | 488 nm                                |
| <i>CH0001 Power</i>                                      | 135 $\mu$ W (close to the embryo)                  | 135 $\mu$ W (close to the embryo)                  | 135 $\mu$ W (close to the embryo)     |
| <i>CH0001 Exposure Time</i>                              | 50 ms                                              | 50 ms                                              | 50 ms                                 |
| <i>CH0001 Emission Filter</i>                            | 525/50 single-band<br>bandpass filter              | 525/50 single-band<br>bandpass filter              | 525/50 single-band<br>bandpass filter |
| <i>CH0001 Theoretical<br/>Lateral / Axial Resolution</i> | ~850 nm / ~3,200 nm                                | ~850 nm / ~3,200 nm                                | ~850 nm / ~3,200 nm                   |
| <b><i>Planes (PL)</i></b>                                | <b>100 (PL0001-PL0100)</b>                         | <b>100 (PL0001-PL0100)</b>                         | <b>100 (PL0001-PL0100)</b>            |
| <i>Z Spacing</i>                                         | 2.58 $\mu$ m                                       | 2.58 $\mu$ m                                       | 2.58 $\mu$ m                          |
| <i>Z Distance</i><br>( $PL \times Z$ Spacing)            | 258.0 $\mu$ m                                      | 258.0 $\mu$ m                                      | 258.0 $\mu$ m                         |
| <b><i>X-Dimensions (XD)</i></b>                          | <b>500 pixels</b>                                  | <b>500 pixels</b>                                  | <b>500 pixels</b>                     |
| <i>X Spacing</i>                                         | 0.645 $\mu$ m                                      | 0.645 $\mu$ m                                      | 0.645 $\mu$ m                         |
| <i>X Length</i><br>( $XD \times X$ Spacing)              | 322.5 $\mu$ m                                      | 322.5 $\mu$ m                                      | 322.5 $\mu$ m                         |
| <b><i>Y-Dimensions (YD)</i></b>                          | <b>1390 pixels</b>                                 | <b>1390 pixels</b>                                 | <b>1390 pixels</b>                    |
| <i>Y Spacing</i>                                         | 0.645 $\mu$ m                                      | 0.645 $\mu$ m                                      | 0.645 $\mu$ m                         |
| <i>Y Length</i><br>( $YD \times Y$ Spacing)              | 896.6 $\mu$ m                                      | 896.6 $\mu$ m                                      | 896.6 $\mu$ m                         |

(continued)

| <i>Dataset (DS)</i>           | <b>DS0007</b>                                                                                                                                                                                                                                     | <b>DS0008</b>                        | <b>DS0009</b>              |
|-------------------------------|---------------------------------------------------------------------------------------------------------------------------------------------------------------------------------------------------------------------------------------------------|--------------------------------------|----------------------------|
| <i>Species</i>                | Mediterranean fruit fly (medfly) <i>Ceratitis capitata</i> (Wiedemann)<br>Arthropoda → Insecta → Diptera → Tephritidae                                                                                                                            |                                      |                            |
| <i>Line</i>                   | <i>TREhs43-hid<sup>Ala5</sup>_F1m2<sup>52</sup></i>                                                                                                                                                                                               |                                      |                            |
| <i>Line Genotype</i>          | single insertion / homozygous                                                                                                                                                                                                                     |                                      |                            |
| <i>Stock</i>                  | ~50-80 adults, less than 4 weeks old                                                                                                                                                                                                              |                                      |                            |
| <i>Stock Medium</i>           | refined sugar (524973, REWE Markt GmbH, Köln, Germany)<br>supplemented with 33% (wt/wt) inactive dry yeast (62-106, Flystuff, San Diego, CA, USA)                                                                                                 |                                      |                            |
| <i>Stock Conditions</i>       | 12:00 h light / 12:00 h darkness at 25°C and 70% relative humidity<br>(DR-36VL, Percival Scientific, Perry, IA, USA)                                                                                                                              |                                      |                            |
| <i>Embryo Collection</i>      | cultures were given 10 min at room temperature (23±1°C) to lay embryos                                                                                                                                                                            |                                      |                            |
| <i>Pre-Imaging Incubation</i> | embryo mounting procedure, approximately 00:30 h at room temperature (23±1°C),<br>incubation in the sample chamber, approximately 01:30 h at room temperature (23±1°C)<br>resulting in a total of 02:00 h incubation at room temperature (23±1°C) |                                      |                            |
| <i>LSFM Implementation</i>    | sample chamber-based digital scanned laser light sheet fluorescence microscope (DSLMS) <sup>3</sup>                                                                                                                                               |                                      |                            |
| <i>Laser Lines</i>            | 488 nm / 60 mW Diode Laser<br>(PhoxX 488-60, Omicron-Laserage Laserprodukte GmbH, Rodgau-Dudenhofen, Germany)                                                                                                                                     |                                      |                            |
| <i>Excitation Objective</i>   | 2.5× NA 0.06 EC Epiplan-Neofluar objective (422320-9900-000, Carl Zeiss, Göttingen, Germany)                                                                                                                                                      |                                      |                            |
| <i>Emission Objective</i>     | 20× NA 0.5 W N-Achroplan objective (420957-9900-000, Carl Zeiss, Göttingen, Germany)                                                                                                                                                              |                                      |                            |
| <i>Emission Filters</i>       | 525/50 single-band bandpass filter<br>(FF03-525/50-25, Semrock/AHF Analysentechnik AG, Tübingen, Germany)                                                                                                                                         |                                      |                            |
| <i>Camera</i>                 | high-resolution CCD (Clara, Andor, Belfast, United Kingdom), 14 bit, 1040×1392 pixel (pitch 6.45 μm)                                                                                                                                              |                                      |                            |
| <i>Dataset File Type</i>      | TIFF, 16-bit grayscale (planes saved as z stacks in ZIP-compressed container files, indicated as PL(ZS))                                                                                                                                          |                                      |                            |
| <i>Dechoriation</i>           | 90 s in a 1:9 mixture of<br>~10% (vol/vol) sodium hypochlorite (425044-250ML, Sigma Aldrich, Taufkirchen, Germany)<br>and PBS pH 7.4 (10010-023, Gibco Life Technologies GmbH, Darmstadt, Germany)                                                |                                      |                            |
| <i>Mounting Method</i>        | cobweb holder mounting method (embryos are attached to a thin agarose film spanning a slotted hole) <sup>50</sup>                                                                                                                                 |                                      |                            |
| <i>Mounting Agarose</i>       | 1% (wt/vol) low-melt agarose (6351.2, Carl Roth, Karlsruhe, Germany)<br>in PBS pH 7.4 (10010-023, Gibco Life Technologies GmbH, Darmstadt, Germany)                                                                                               |                                      |                            |
| <i>Imaging Buffer</i>         | PBS pH 7.4 (10010-023, Gibco Life Technologies GmbH, Darmstadt, Germany)                                                                                                                                                                          |                                      |                            |
| <i>Imaging Temperature</i>    | room temperature (23±1°C)                                                                                                                                                                                                                         | room temperature (23±1°C)            | room temperature (23±1°C)  |
| <i>Viewing Perspective</i>    | ventral, lateral,<br>dorsal, lateral                                                                                                                                                                                                              | ventral, lateral,<br>dorsal, lateral | anterior, lateral          |
| <i>Developmental Stages</i>   | II-2 to IV-12                                                                                                                                                                                                                                     | II-2 to VI-17                        | II-2 to VI-16              |
| <i>Retrieval</i>              | developed to healthy adult                                                                                                                                                                                                                        | developed to healthy adult           | developed to healthy adult |

(continued)

| <b>Dataset (DS)</b>                                  | <b>DS0007</b>                                                   | <b>DS0008</b>                                               | <b>DS0009</b>                                                       |
|------------------------------------------------------|-----------------------------------------------------------------|-------------------------------------------------------------|---------------------------------------------------------------------|
| <i>Dataset Size</i>                                  | 19.4 Gigabyte (TIFF)                                            | 41.7 Gigabyte (TIFF)                                        | 11.8 Gigabyte (TIFF)                                                |
| <i>Dataset Access</i>                                | DOI: 10.5281/zenodo.6456820                                     | DOI: 10.5281/zenodo.6457004                                 | DOI: 10.5281/zenodo.6457894                                         |
| <i>Figures</i>                                       | -                                                               | -                                                           | -                                                                   |
| <i>Supplementary Figures</i>                         | -                                                               | -                                                           | -                                                                   |
| <i>Supplementary Videos</i>                          | -                                                               | -                                                           | -                                                                   |
| <i>Comment</i>                                       | embryo not captured <i>in toto</i> , covers germ cell formation | embryo not captured <i>in toto</i> , covers head involution | embryo not captured <i>in toto</i> , agarose hemisphere mounting    |
| <b>Time Points (TP)</b>                              | <b>49 (TP0001-TP0049)</b>                                       | <b>123 (TP0001-TP0123)</b>                                  | <b>93 (TP0001-TP0093)</b>                                           |
| <i>TP Interval</i>                                   | 30 min                                                          | 30 min                                                      | 30 min                                                              |
| <i>Total Time</i><br><i>((TP-1)×TP Interval)</i>     | 24:00 h                                                         | 61:00 h                                                     | 46:00 h                                                             |
| <b>Directions (DR)</b>                               | <b>4 (DR0001-DR0004)</b>                                        | <b>4 (DR0001-DR0004)</b>                                    | <b>2 (DR0001-DR0002)</b>                                            |
| <i>DR Orientations</i>                               | 0°, 90°, 180°, 270°                                             | 0°, 90°, 180°, 270°                                         | 0°, 90°                                                             |
| <b>Channels (CH)</b>                                 | <b>1 (CH0001)</b>                                               | <b>1 (CH0001)</b>                                           | <b>1 (CH0001)</b>                                                   |
| <i>CH0001 Excitation</i>                             | 488 nm                                                          | 488 nm                                                      | 488 nm                                                              |
| <i>CH0001 Power</i>                                  | 135 μW (close to the embryo)                                    | 135 μW (close to the embryo)                                | 135 μW (close to the embryo)                                        |
| <i>CH0001 Exposure Time</i>                          | 50 ms                                                           | 50 ms                                                       | 50 ms                                                               |
| <i>CH0001 Emission Filter</i>                        | 525/50 single-band bandpass filter                              | 525/50 single-band bandpass filter                          | 525/50 single-band bandpass filter                                  |
| <i>CH0001 Theoretical Lateral / Axial Resolution</i> | ~510 nm / ~2,300 nm                                             | ~510 nm / ~2,300 nm                                         | ~510 nm / ~2,300 nm                                                 |
| <b>Planes (PL)</b>                                   | <b>100 (PL0001-PL0100)</b>                                      | <b>100 (PL0001-PL0100)</b>                                  | <b>DR0001: 115 (PL0001-PL0115),<br/>DR0002: 100 (PL0001-PL0100)</b> |
| <i>Z Spacing</i>                                     | 2.58 μm                                                         | 2.58 μm                                                     | 2.58 μm                                                             |
| <i>Z Distance</i><br><i>(PL×Z Spacing)</i>           | 258.0 μm                                                        | 258.0 μm                                                    | DR0001: 296.7 μm,<br>DR0002: 258.0 μm                               |
| <b>X-Dimensions (XD)</b>                             | <b>720 pixels</b>                                               | <b>720 pixels</b>                                           | <b>DR0001: 720 pixels,<br/>DR0002: 1000 pixels</b>                  |
| <i>X Spacing</i>                                     | 0.3225 μm                                                       | 0.3225 μm                                                   | 0.3225 μm                                                           |
| <i>X Length</i><br><i>(XD×X Spacing)</i>             | 232.2 μm                                                        | 232.2 μm                                                    | DR0001: 232.2 μm,<br>DR0002: 322.5 μm                               |
| <b>Y-Dimensions (YD)</b>                             | <b>1300 pixels</b>                                              | <b>1300 pixels</b>                                          | <b>720 pixels</b>                                                   |
| <i>Y Spacing</i>                                     | 0.3225 μm                                                       | 0.3225 μm                                                   | 0.3225 μm                                                           |
| <i>Y Length</i><br><i>(YD×Y Spacing)</i>             | 419.25 μm                                                       | 419.25 μm                                                   | 232.2 μm                                                            |

**Supplementary Table 2 – Embryogenetic events onset time points for DS0001–DS0005.** Embryogenetic events are color-coded (see Methods section). Since imaging started approximately 2 h after embryo collection, the first time point (TP0001) was set to 02:00 h of absolute development. I, blastoderm formation; II, early gastrulation; III, germband elongation; IV, germband retraction; V, dorsal closure; VI, muscular movement. TP, imaging time point; time, absolute time passed from the onset of I until the indicated TP; rel dev, relative progress of embryonic development from the onset of I until the indicated TP.

| Event        | DS0001 (median) |         |         | DS0002 (longer) |         |         | DS0003 (longer) |         |         |
|--------------|-----------------|---------|---------|-----------------|---------|---------|-----------------|---------|---------|
|              | TP              | time    | rel dev | TP              | time    | rel dev | TP              | time    | rel dev |
| <b>I</b>     | -               | 00:00 h | 0.0%    | -               | 00:00 h | 0.0%    | -               | 00:00 h | 0.0%    |
| <b>II</b>    | 0020            | 11:30 h | 18.4%   | 0022            | 12:30 h | 19.2%   | 0021            | 12:00 h | 19.0%   |
| <b>III</b>   | 0026            | 14:30 h | 23.2%   | 0027            | 15:00 h | 23.1%   | 0026            | 14:30 h | 23.0%   |
| <b>IV</b>    | 0046            | 24:30 h | 39.2%   | 0048            | 25:30 h | 39.2%   | 0046            | 24:30 h | 38.9%   |
| <b>V</b>     | 0061            | 32:00 h | 51.2%   | 0062            | 32:30 h | 50.0%   | 0059            | 31:00 h | 49.2%   |
| <b>VI</b>    | 0087            | 45:00 h | 72.0%   | 0084            | 43:30 h | 66.9%   | 0086            | 44:30 h | 70.6%   |
| <b>Hatch</b> | 0122            | 62:30 h | 100.0%  | 0127            | 65:00 h | 100.0%  | 0123            | 63:00 h | 100.0%  |

(continued)

| Event        | DS0004 (shorter) |         |         | DS0005 (shorter) |         |         | Standard Deviations |         |
|--------------|------------------|---------|---------|------------------|---------|---------|---------------------|---------|
|              | TP               | time    | rel dev | TP               | time    | rel dev | time                | rel dev |
| <b>I</b>     | -                | 00:00 h | 0.0%    | -                | 00:00 h | 0.0%    | ±00:00 h            | ±0.0%   |
| <b>II</b>    | 0019             | 11:00 h | 18.3%   | 0019             | 11:00 h | 18.5%   | ±00:39 h            | ±0.4%   |
| <b>III</b>   | 0024             | 13:30 h | 22.5%   | 0024             | 13:30 h | 22.7%   | ±00:40 h            | ±0.3%   |
| <b>IV</b>    | 0044             | 23:30 h | 39.2%   | 0044             | 23:30 h | 39.5%   | ±00:50 h            | ±0.2%   |
| <b>V</b>     | 0053             | 28:00 h | 46.7%   | 0055             | 29:00 h | 48.7%   | ±01:56 h            | ±1.7%   |
| <b>VI</b>    | 0079             | 41:00 h | 68.3%   | 0082             | 42:30 h | 71.4%   | ±01:36 h            | ±2.2%   |
| <b>Hatch</b> | 0117             | 60:00 h | 100.0%  | 0116             | 59:30 h | 100.0%  | ±02:15 h            | ±0.0%   |

**Supplementary Table 3 – Stage onset time points for DS0001–DS0005.** Onset time points of embryogenetic events are color-coded (see Methods section). Since imaging started approximately 2 h after embryo collection, the first time point (TP0001) was set to 02:00 h of absolute development. TP, imaging time point; time, absolute time passed from the onset of I-1 until the indicated TP; rel dev, relative progress of embryonic development from the onset of I-1 until the indicated TP.

| Stage  | DS0001 (median) |         |         | DS0002 (longer) |         |         | DS0003 (longer) |         |         |
|--------|-----------------|---------|---------|-----------------|---------|---------|-----------------|---------|---------|
|        | TP              | time    | rel dev | TP              | time    | rel dev | TP              | time    | rel dev |
| I-1    | -               | 00:00 h | 0.0%    | -               | 00:00 h | 0.0%    | -               | 00:00 h | 0.0%    |
| I-2    | 0001            | 02:00 h | 3.2%    | 0001            | 02:00 h | 3.1%    | 0001            | 02:00 h | 3.2%    |
| I-3    | 0004            | 03:30 h | 5.6%    | 0004            | 03:30 h | 5.4%    | 0004            | 03:30 h | 5.6%    |
| I-4    | 0006            | 04:30 h | 7.2%    | 0007            | 05:00 h | 7.7%    | 0006            | 04:30 h | 7.1%    |
| I-5    | 0010            | 06:30 h | 10.4%   | 0011            | 07:00 h | 10.8%   | 0010            | 06:30 h | 10.3%   |
| II-6   | 0020            | 11:30 h | 18.4%   | 0022            | 12:30 h | 19.2%   | 0021            | 12:00 h | 19.0%   |
| II-7   | 0024            | 13:30 h | 21.6%   | 0026            | 14:30 h | 22.3%   | 0025            | 14:00 h | 22.2%   |
| III-8  | 0026            | 14:30 h | 23.2%   | 0027            | 15:00 h | 23.1%   | 0026            | 14:30 h | 23.0%   |
| III-9  | 0030            | 16:30 h | 26.4%   | 0031            | 17:00 h | 26.2%   | 0030            | 16:30 h | 26.2%   |
| III-10 | 0033            | 18:00 h | 28.8%   | 0032            | 17:30 h | 26.9%   | 0032            | 17:30 h | 27.8%   |
| III-11 | 0041            | 22:00 h | 35.2%   | 0043            | 23:00 h | 35.4%   | 0038            | 20:30 h | 32.5%   |
| IV-12  | 0046            | 24:30 h | 39.2%   | 0048            | 25:30 h | 39.2%   | 0046            | 24:30 h | 38.9%   |
| V-13   | 0061            | 32:00 h | 51.2%   | 0062            | 32:30 h | 50.0%   | 0059            | 31:00 h | 49.2%   |
| V-14   | 0066            | 34:30 h | 55.2%   | 0068            | 35:30 h | 54.6%   | 0066            | 34:30 h | 54.8%   |
| V-15   | 0073            | 38:00 h | 60.8%   | 0074            | 38:30 h | 59.2%   | 0071            | 37:00 h | 58.7%   |
| VI-16  | 0087            | 45:00 h | 72.0%   | 0084            | 43:30 h | 66.9%   | 0086            | 44:30 h | 70.6%   |
| VI-17  | 0106            | 54:30 h | 87.2%   | 0110            | 56:30 h | 86.9%   | 0104            | 53:30 h | 84.9%   |
| Hatch  | 0122            | 62:30 h | 100.0%  | 0127            | 65:00 h | 100.0%  | 0123            | 63:00 h | 100.0%  |

(continued)

| Stage  | DS0004 (shorter) |         |         | DS0005 (shorter) |         |         | Standard Deviations |         |
|--------|------------------|---------|---------|------------------|---------|---------|---------------------|---------|
|        | TP               | time    | rel dev | TP               | time    | rel dev | time                | rel dev |
| I-1    | -                | 00:00 h | 0.0%    | -                | 00:00 h | 0.0%    | ±00:00 h            | ±0.0%   |
| I-2    | 0001             | 02:00 h | 3.3%    | 0001             | 02:00 h | 3.4%    | ±00:00 h            | ±0.1%   |
| I-3    | 0004             | 03:30 h | 5.8%    | 0004             | 03:30 h | 5.9%    | ±00:00 h            | ±0.2%   |
| I-4    | 0006             | 04:30 h | 7.5%    | 0006             | 04:30 h | 7.6%    | ±00:13 h            | ±0.2%   |
| I-5    | 0010             | 06:30 h | 10.8%   | 0010             | 06:30 h | 10.9%   | ±00:13 h            | ±0.3%   |
| II-6   | 0019             | 11:00 h | 18.3%   | 0019             | 11:00 h | 18.5%   | ±00:39 h            | ±0.4%   |
| II-7   | 0023             | 13:00 h | 21.7%   | 0023             | 13:00 h | 21.8%   | ±00:39 h            | ±0.3%   |
| III-8  | 0024             | 13:30 h | 22.5%   | 0024             | 13:30 h | 22.7%   | ±00:40 h            | ±0.3%   |
| III-9  | 0029             | 16:00 h | 26.7%   | 0029             | 16:00 h | 26.9%   | ±00:25 h            | ±0.3%   |
| III-10 | 0031             | 17:00 h | 28.3%   | 0031             | 17:00 h | 28.6%   | ±00:25 h            | ±0.8%   |
| III-11 | 0036             | 19:30 h | 32.5%   | 0038             | 20:30 h | 34.5%   | ±01:23 h            | ±1.4%   |
| IV-12  | 0044             | 23:30 h | 39.2%   | 0044             | 23:30 h | 39.5%   | ±00:50 h            | ±0.2%   |
| V-13   | 0053             | 28:00 h | 46.7%   | 0055             | 29:00 h | 48.7%   | ±01:56 h            | ±1.7%   |
| V-14   | 0062             | 32:30 h | 54.2%   | 0062             | 32:30 h | 54.6%   | ±01:20 h            | ±0.4%   |
| V-15   | 0069             | 36:00 h | 60.0%   | 0071             | 37:00 h | 62.2%   | ±00:58 h            | ±1.4%   |
| VI-16  | 0079             | 41:00 h | 68.3%   | 0082             | 42:30 h | 71.4%   | ±01:36 h            | ±2.2%   |
| VI-17  | 0097             | 50:00 h | 83.3%   | 0101             | 52:00 h | 87.4%   | ±02:27 h            | ±1.8%   |
| Hatch  | 0117             | 60:00 h | 100.0%  | 0116             | 59:30 h | 100.0%  | ±02:15 h            | ±0.0%   |

**Supplementary Table 4 – Time point-based alignment of DS0002–DS0005 to DS0001.** Onset time points of embryogenetic events are color-coded (see Methods section). Since imaging started approximately 2 h after embryo collection, the first time point (TP0001) was set to 02:00 h of absolute development. Imaging typically begins with stage I-2, the values for I-1 are extrapolated. TP, imaging time point; time, absolute time passed from the onset of I-1 until the indicated TP; rel dev, relative progress of embryonic development from the onset of I-1 until the indicated TP.

| Stage         | TP          | DS0001 (median) |         | DS0002 (aligned) |         | DS0003 (aligned) |         | DS0004 (aligned) |         | DS0005 (aligned) |         | Standard Deviation |         |
|---------------|-------------|-----------------|---------|------------------|---------|------------------|---------|------------------|---------|------------------|---------|--------------------|---------|
|               |             | time            | rel dev | time             | rel dev | time             | rel dev | time             | rel dev | time             | rel dev | time               | rel dev |
| <b>I-1</b>    | -           | 00:00 h         | 0.0%    | 00:00 h          | 0.0%    | 00:00 h          | 0.0%    | 00:00 h          | 0.0%    | 00:00 h          | 0.0%    | ±0:00 h            | ±0.0%   |
|               | -           | 00:30 h         | 0.8%    | 00:30 h          | 0.8%    | 00:30 h          | 0.8%    | 00:30 h          | 0.8%    | 00:30 h          | 0.8%    | ±0:00 h            | ±0.0%   |
|               | -           | 01:00 h         | 1.6%    | 01:00 h          | 1.5%    | 01:00 h          | 1.6%    | 01:00 h          | 1.7%    | 01:00 h          | 1.7%    | ±0:00 h            | ±0.1%   |
|               | -           | 01:30 h         | 2.4%    | 01:30 h          | 2.3%    | 01:30 h          | 2.4%    | 01:30 h          | 2.5%    | 01:30 h          | 2.5%    | ±0:00 h            | ±0.1%   |
| <b>I-2</b>    | <b>0001</b> | 02:00 h         | 3.2%    | 02:00 h          | 3.1%    | 02:00 h          | 3.2%    | 02:00 h          | 3.3%    | 02:00 h          | 3.4%    | ±0:00 h            | ±0.1%   |
|               | <b>0002</b> | 02:30 h         | 4.0%    | 02:30 h          | 3.8%    | 02:30 h          | 4.0%    | 02:30 h          | 4.2%    | 02:30 h          | 4.2%    | ±0:00 h            | ±0.1%   |
|               | <b>0003</b> | 03:00 h         | 4.8%    | 03:00 h          | 4.6%    | 03:00 h          | 4.8%    | 03:00 h          | 5.0%    | 03:00 h          | 5.0%    | ±0:00 h            | ±0.2%   |
| <b>I-3</b>    | <b>0004</b> | 03:30 h         | 5.6%    | 03:30 h          | 5.4%    | 03:30 h          | 5.6%    | 03:30 h          | 5.8%    | 03:30 h          | 5.9%    | ±0:00 h            | ±0.2%   |
|               | <b>0005</b> | 04:00 h         | 6.4%    | 04:30 h          | 6.9%    | 04:00 h          | 6.3%    | 04:00 h          | 6.7%    | 04:00 h          | 6.7%    | ±0:13 h            | ±0.2%   |
| <b>I-4</b>    | <b>0007</b> | 04:30 h         | 7.2%    | 05:00 h          | 7.7%    | 04:30 h          | 7.1%    | 04:30 h          | 7.5%    | 04:30 h          | 7.6%    | ±0:13 h            | ±0.2%   |
|               | <b>0008</b> | 05:00 h         | 8.0%    | 05:30 h          | 8.5%    | 05:00 h          | 7.9%    | 05:00 h          | 8.3%    | 05:00 h          | 8.4%    | ±0:13 h            | ±0.2%   |
|               | <b>0009</b> | 05:30 h         | 8.8%    | 06:00 h          | 9.2%    | 05:30 h          | 8.7%    | 05:30 h          | 9.2%    | 05:30 h          | 9.2%    | ±0:13 h            | ±0.2%   |
|               | <b>0010</b> | 06:00 h         | 9.6%    | 06:30 h          | 10.0%   | 06:00 h          | 9.5%    | 06:00 h          | 10.0%   | 06:00 h          | 10.1%   | ±0:13 h            | ±0.3%   |
| <b>I-5</b>    | <b>0011</b> | 06:30 h         | 10.4%   | 07:00 h          | 10.8%   | 06:30 h          | 10.3%   | 06:30 h          | 10.8%   | 06:30 h          | 10.9%   | ±0:13 h            | ±0.3%   |
|               | <b>0012</b> | 07:00 h         | 11.2%   | 07:33 h          | 11.6%   | 07:03 h          | 11.2%   | 06:56 h          | 11.6%   | 06:56 h          | 11.7%   | ±0:15 h            | ±0.2%   |
|               | <b>0013</b> | 07:30 h         | 12.0%   | 08:06 h          | 12.5%   | 07:36 h          | 12.1%   | 07:23 h          | 12.3%   | 07:23 h          | 12.4%   | ±0:18 h            | ±0.2%   |
|               | <b>0014</b> | 08:00 h         | 12.8%   | 08:40 h          | 13.3%   | 08:10 h          | 13.0%   | 07:50 h          | 13.1%   | 07:50 h          | 13.2%   | ±0:20 h            | ±0.2%   |
|               | <b>0015</b> | 08:30 h         | 13.6%   | 09:13 h          | 14.2%   | 08:43 h          | 13.8%   | 08:16 h          | 13.8%   | 08:16 h          | 13.9%   | ±0:23 h            | ±0.2%   |
|               | <b>0016</b> | 09:00 h         | 14.4%   | 09:46 h          | 15.0%   | 09:16 h          | 14.7%   | 08:43 h          | 14.5%   | 08:43 h          | 14.7%   | ±0:26 h            | ±0.2%   |
|               | <b>0017</b> | 09:30 h         | 15.2%   | 10:20 h          | 15.9%   | 09:50 h          | 15.6%   | 09:10 h          | 15.3%   | 09:10 h          | 15.4%   | ±0:29 h            | ±0.3%   |
|               | <b>0018</b> | 10:00 h         | 16.0%   | 10:53 h          | 16.8%   | 10:23 h          | 16.5%   | 09:36 h          | 16.0%   | 09:36 h          | 16.2%   | ±0:32 h            | ±0.3%   |
|               | <b>0019</b> | 10:30 h         | 16.8%   | 11:26 h          | 17.6%   | 10:56 h          | 17.4%   | 10:03 h          | 16.8%   | 10:03 h          | 16.9%   | ±0:35 h            | ±0.4%   |
|               | <b>0020</b> | 11:00 h         | 17.6%   | 12:00 h          | 18.5%   | 11:30 h          | 18.3%   | 10:30 h          | 17.5%   | 10:30 h          | 17.6%   | ±0:39 h            | ±0.4%   |
| <b>II-6</b>   | <b>0021</b> | 11:30 h         | 18.4%   | 12:30 h          | 19.2%   | 12:00 h          | 19.0%   | 11:00 h          | 18.3%   | 11:00 h          | 18.5%   | ±0:39 h            | ±0.4%   |
|               | <b>0022</b> | 12:00 h         | 19.2%   | 13:00 h          | 20.0%   | 12:30 h          | 19.8%   | 11:30 h          | 19.2%   | 11:30 h          | 19.3%   | ±0:39 h            | ±0.4%   |
|               | <b>0023</b> | 12:30 h         | 20.0%   | 13:30 h          | 20.8%   | 13:00 h          | 20.6%   | 12:00 h          | 20.0%   | 12:00 h          | 20.2%   | ±0:39 h            | ±0.4%   |
|               | <b>0024</b> | 13:00 h         | 20.8%   | 14:00 h          | 21.5%   | 13:30 h          | 21.4%   | 12:30 h          | 20.8%   | 12:30 h          | 21.0%   | ±0:39 h            | ±0.3%   |
| <b>II-7</b>   | <b>0024</b> | 13:30 h         | 21.6%   | 14:30 h          | 22.3%   | 14:00 h          | 22.2%   | 13:00 h          | 21.7%   | 13:00 h          | 21.8%   | ±0:39 h            | ±0.3%   |
|               | <b>0025</b> | 14:00 h         | 22.4%   | 14:30 h          | 22.3%   | 14:00 h          | 22.2%   | 13:00 h          | 21.7%   | 13:00 h          | 21.8%   | ±0:40 h            | ±0.3%   |
| <b>III-8</b>  | <b>0026</b> | 14:30 h         | 23.2%   | 15:00 h          | 23.1%   | 14:30 h          | 23.0%   | 13:30 h          | 22.5%   | 13:30 h          | 22.7%   | ±0:40 h            | ±0.3%   |
|               | <b>0027</b> | 15:00 h         | 24.0%   | 15:30 h          | 23.8%   | 15:00 h          | 23.8%   | 14:10 h          | 23.6%   | 14:10 h          | 23.8%   | ±0:35 h            | ±0.1%   |
|               | <b>0028</b> | 15:30 h         | 24.8%   | 16:00 h          | 24.6%   | 15:30 h          | 24.6%   | 14:50 h          | 24.7%   | 14:50 h          | 24.9%   | ±0:30 h            | ±0.1%   |
|               | <b>0029</b> | 16:00 h         | 25.6%   | 16:30 h          | 25.4%   | 16:00 h          | 25.4%   | 15:30 h          | 25.8%   | 15:30 h          | 26.1%   | ±0:25 h            | ±0.3%   |
| <b>III-9</b>  | <b>0030</b> | 16:30 h         | 26.4%   | 17:00 h          | 26.2%   | 16:30 h          | 26.2%   | 16:00 h          | 26.7%   | 16:00 h          | 26.9%   | ±0:25 h            | ±0.3%   |
|               | <b>0031</b> | 17:00 h         | 27.2%   | 17:00 h          | 26.2%   | 16:45 h          | 26.6%   | 16:15 h          | 27.1%   | 16:15 h          | 27.3%   | ±0:22 h            | ±0.5%   |
|               | <b>0032</b> | 17:30 h         | 28.0%   | 17:00 h          | 26.2%   | 17:00 h          | 27.0%   | 16:30 h          | 27.5%   | 16:30 h          | 27.7%   | ±0:25 h            | ±0.7%   |
| <b>III-10</b> | <b>0033</b> | 18:00 h         | 28.8%   | 17:30 h          | 26.9%   | 17:30 h          | 27.8%   | 17:00 h          | 28.3%   | 17:00 h          | 28.6%   | ±0:25 h            | ±0.8%   |
|               | <b>0034</b> | 18:30 h         | 29.6%   | 18:12 h          | 28.0%   | 17:51 h          | 28.3%   | 17:17 h          | 28.8%   | 17:25 h          | 29.3%   | ±0:30 h            | ±0.7%   |
|               | <b>0035</b> | 19:00 h         | 30.4%   | 18:55 h          | 29.1%   | 18:12 h          | 28.9%   | 17:34 h          | 29.3%   | 17:51 h          | 30.0%   | ±0:38 h            | ±0.6%   |
|               | <b>0036</b> | 19:30 h         | 31.2%   | 19:38 h          | 30.2%   | 18:34 h          | 29.5%   | 17:51 h          | 29.8%   | 18:17 h          | 30.7%   | ±0:46 h            | ±0.7%   |
|               | <b>0037</b> | 20:00 h         | 32.0%   | 20:21 h          | 31.3%   | 18:55 h          | 30.0%   | 18:08 h          | 30.2%   | 18:42 h          | 31.5%   | ±0:55 h            | ±0.8%   |
|               | <b>0038</b> | 20:30 h         | 32.8%   | 21:04 h          | 32.4%   | 19:17 h          | 30.6%   | 18:25 h          | 30.7%   | 19:08 h          | 32.2%   | ±0:04 h            | ±1.0%   |
|               | <b>0039</b> | 21:00 h         | 33.6%   | 21:47 h          | 33.5%   | 19:38 h          | 31.2%   | 18:42 h          | 31.2%   | 19:34 h          | 32.9%   | ±0:13 h            | ±1.2%   |
|               | <b>0040</b> | 21:30 h         | 34.4%   | 22:30 h          | 34.6%   | 20:00 h          | 31.7%   | 19:00 h          | 31.7%   | 20:00 h          | 33.6%   | ±0:12 h            | ±1.4%   |
| <b>III-11</b> | <b>0041</b> | 22:00 h         | 35.2%   | 23:00 h          | 35.4%   | 20:30 h          | 32.5%   | 19:30 h          | 32.5%   | 20:30 h          | 34.5%   | ±0:12 h            | ±1.4%   |
|               | <b>0042</b> | 22:30 h         | 36.0%   | 23:30 h          | 36.2%   | 21:22 h          | 33.9%   | 20:22 h          | 34.0%   | 21:07 h          | 35.5%   | ±0:13 h            | ±1.1%   |
|               | <b>0043</b> | 23:00 h         | 36.8%   | 24:00 h          | 36.9%   | 22:15 h          | 35.3%   | 21:15 h          | 35.4%   | 21:45 h          | 36.6%   | ±0:04 h            | ±0.8%   |
|               | <b>0044</b> | 23:30 h         | 37.6%   | 24:30 h          | 37.7%   | 23:07 h          | 36.7%   | 22:07 h          | 36.9%   | 22:22 h          | 37.6%   | ±0:56 h            | ±0.5%   |
|               | <b>0045</b> | 24:00 h         | 38.4%   | 25:00 h          | 38.5%   | 24:00 h          | 38.1%   | 23:00 h          | 38.3%   | 23:00 h          | 38.7%   | ±0:50 h            | ±0.2%   |
| <b>IV-12</b>  | <b>0046</b> | 24:30 h         | 39.2%   | 25:30 h          | 39.2%   | 24:30 h          | 38.9%   | 23:30 h          | 39.2%   | 23:30 h          | 39.5%   | ±0:50 h            | ±0.2%   |
|               | <b>0047</b> | 25:00 h         | 40.0%   | 25:57 h          | 39.9%   | 24:55 h          | 39.6%   | 23:47 h          | 39.6%   | 23:51 h          | 40.1%   | ±0:54 h            | ±0.2%   |
|               | <b>0048</b> | 25:30 h         | 40.8%   | 26:25 h          | 40.7%   | 25:21 h          | 40.2%   | 24:04 h          | 40.1%   | 24:12 h          | 40.7%   | ±0:58 h            | ±0.3%   |
|               | <b>0049</b> | 26:00 h         | 41.6%   | 26:53 h          | 41.4%   | 25:47 h          | 40.9%   | 24:21 h          | 40.6%   | 24:34 h          | 41.3%   | ±0:03 h            | ±0.4%   |
|               | <b>0050</b> | 26:30 h         | 42.4%   | 27:21 h          | 42.1%   | 26:12 h          | 41.6%   | 24:38 h          | 41.1%   | 24:55 h          | 41.9%   | ±0:07 h            | ±0.5%   |
|               | <b>0051</b> | 27:00 h         | 43.2%   | 27:49 h          | 42.8%   | 26:38 h          | 42.3%   | 24:55 h          | 41.5%   | 25:17 h          | 42.5%   | ±0:12 h            | ±0.6%   |
|               | <b>0052</b> | 27:30 h         | 44.0%   | 28:17 h          | 43.5%   | 27:04 h          | 43.0%   | 25:12 h          | 42.0%   | 25:38 h          | 43.1%   | ±0:17 h            | ±0.7%   |
|               | <b>0053</b> | 28:00 h         | 44.8%   | 28:45 h          | 44.2%   | 27:30 h          | 43.7%   | 25:30 h          | 42.5%   | 26:00 h          | 43.7%   | ±0:21 h            | ±0.9%   |
|               | <b>0054</b> | 28:30 h         | 45.6%   | 29:12 h          | 44.9%   | 27:55 h          | 44.3%   | 25:47 h          | 43.0%   | 26:21 h          | 44.3%   | ±0:26 h            | ±1.0%   |
|               | <b>0055</b> | 29:00 h         | 46.4%   | 29:40 h          | 45.7%   | 28:21 h          | 45.0%   | 26:04 h          | 43.5%   | 26:42 h          | 44.9%   | ±0:31 h            | ±1.1%   |
|               | <b>0056</b> | 29:30 h         | 47.2%   | 30:08 h          | 46.4%   | 28:47 h          | 45.7%   | 26:21 h          | 43.9%   | 27:04 h          | 45.5%   | ±0:36 h            | ±1.2%   |
|               | <b>0057</b> | 30:00 h         | 48.0%   | 30:36 h          | 47.1%   | 29:12 h          | 46.4%   | 26:38 h          | 44.4%   | 27:25 h          | 46.1%   | ±0:41 h            | ±1.3%   |
| <b>V-13</b>   | <b>0058</b> | 30:30 h         | 48.8%   | 31:04 h          | 47.8%   | 29:38 h          | 47.1%   | 26:55 h          | 44.9%   | 27:47 h          | 46.7%   | ±0:46 h            | ±1.5%   |
|               | <b>0059</b> | 31:00 h         | 49.6%   | 31:32 h          | 48.5%   | 30:04 h          | 47.7%   | 27:12 h          | 45.4%   | 28:08 h          | 47.3%   | ±0:51 h            | ±1.6%   |
|               | <b>0060</b> | 31:30 h         | 50.4%   | 32:00 h          | 49.2%   | 30:30 h          | 48.4%   | 27:30 h          | 45.8%   | 28:30 h          | 47.9%   | ±0:56 h            | ±1.7%   |
|               | <b>0061</b> | 32:00 h         | 51.2%   | 32:30 h          | 50.0%   | 31:00 h          | 49.2%   | 28:00 h          | 46.7%   | 29:00 h          | 48.7%   | ±0:56 h            | ±1.7%   |
|               | <b>0062</b> | 32:30 h         | 52.0%   | 33:07 h          | 51.0%   | 31:45 h          | 50.4%   | 29:00 h          | 48.3%   | 29:45 h          | 50.0%   | ±0:46 h            | ±1.3%   |
|               | <b>0063</b> | 33:00 h         | 52.8%   | 33:45 h          | 51.9%   | 32:30 h          | 51.6%   | 30:00 h          | 50.0%   | 30:30 h          | 51.3%   | ±0:37 h            | ±1.0%   |
|               | <b>0064</b> | 33:30 h         | 53.6%   | 34:22 h          | 52.9%   | 33:15 h          | 52.8%   | 31:00 h          | 51.7%   | 31:15 h          | 52.5%   | ±0:28 h            | ±0.7%   |
|               | <b>0065</b> | 34:00 h         | 54.4%   | 35:00 h          | 53.8%   | 34:00 h          | 54.0%   | 32:00 h          | 53.3%   | 32:00 h          | 53.8%   | ±0:20 h            | ±0.4%   |
|               | <b>0066</b> | 34:30 h         | 55.2%   | 35:30 h          | 54.6%   | 34:30 h          | 54.8%   | 32:30 h          | 54.2%   | 32:30 h          | 54.6%   | ±0:20 h            | ±0.4%   |
| <b>V-14</b>   | <b>0067</b> | 35:00 h         | 56.0%   | 35:55 h          | 55.3%   | 34:50 h          | 55.3%   | 33:00 h          | 55.0%   | 33:10 h          | 55.7%   | ±0:15 h            | ±0.4%   |
|               | <b>0068</b> | 35:30 h         | 56.8%   | 36:20 h          | 55.9%   | 35:10 h          | 55.8%   | 33:30 h          | 55.8%   | 33:50 h          | 56.9%   | ±0:10 h            | ±0.5%   |
|               | <b>0069</b> | 36:00 h         | 57.6%   | 36:45 h          | 56.5%   | 35:30 h          | 56.3%   | 34:00 h          | 56.7%   | 34:30 h          | 58.0%   | ±0:06 h            | ±0.7%   |
|               | <b>0070</b> | 36:30 h         | 58.4%   | 37:10 h          | 57.2%   | 35:50 h          | 56.9%   | 34:30 h          | 57.5%   | 35:10 h          | 59.1%   | ±0:03 h            | ±0.9%   |
|               | <b>0071</b> | 37:00 h         | 59.2%   | 37:35 h          | 57.8%   | 36:10 h          | 57.4%   | 35:00 h          | 58.3%   | 35:50 h          | 60.2%   | ±0:00 h            | ±1.1%   |
|               | <b>0072</b> | 37:30 h         | 60.0%   | 38:00 h          | 58.5%   | 36:30 h          | 57.9%   | 35:30 h          | 59.2%   | 36:30 h          | 61.3%   | ±0:58 h            | ±1.3%   |

(continued)

|              |             |         |        |         |        |         |        |         |        |         |        |          |       |
|--------------|-------------|---------|--------|---------|--------|---------|--------|---------|--------|---------|--------|----------|-------|
| <b>V-15</b>  | <b>0073</b> | 38:00 h | 60.8%  | 38:30 h | 59.2%  | 37:00 h | 58.7%  | 36:00 h | 60.0%  | 37:00 h | 62.2%  | ±00:58 h | ±1.4% |
|              | <b>0074</b> | 38:30 h | 61.6%  | 38:50 h | 59.8%  | 37:32 h | 59.6%  | 36:20 h | 60.6%  | 37:23 h | 62.8%  | ±00:59 h | ±1.4% |
|              | <b>0075</b> | 39:00 h | 62.4%  | 39:11 h | 60.3%  | 38:04 h | 60.4%  | 36:41 h | 61.2%  | 37:46 h | 63.5%  | ±01:00 h | ±1.4% |
|              | <b>0076</b> | 39:30 h | 63.2%  | 39:32 h | 60.8%  | 38:36 h | 61.3%  | 37:02 h | 61.7%  | 38:09 h | 64.1%  | ±01:02 h | ±1.4% |
|              | <b>0077</b> | 40:00 h | 64.0%  | 39:53 h | 61.4%  | 39:09 h | 62.1%  | 37:23 h | 62.3%  | 38:32 h | 64.8%  | ±01:04 h | ±1.4% |
|              | <b>0078</b> | 40:30 h | 64.8%  | 40:13 h | 61.9%  | 39:41 h | 63.0%  | 37:43 h | 62.9%  | 38:55 h | 65.4%  | ±01:07 h | ±1.5% |
|              | <b>0079</b> | 41:00 h | 65.6%  | 40:34 h | 62.4%  | 40:13 h | 63.9%  | 38:04 h | 63.5%  | 39:18 h | 66.1%  | ±01:09 h | ±1.5% |
|              | <b>0080</b> | 41:30 h | 66.4%  | 40:55 h | 63.0%  | 40:46 h | 64.7%  | 38:25 h | 64.0%  | 39:41 h | 66.7%  | ±01:13 h | ±1.6% |
|              | <b>0081</b> | 42:00 h | 67.2%  | 41:16 h | 63.5%  | 41:18 h | 65.6%  | 38:46 h | 64.6%  | 40:04 h | 67.4%  | ±01:16 h | ±1.7% |
|              | <b>0082</b> | 42:30 h | 68.0%  | 41:36 h | 64.0%  | 41:50 h | 66.4%  | 39:06 h | 65.2%  | 40:27 h | 68.0%  | ±01:20 h | ±1.7% |
|              | <b>0083</b> | 43:00 h | 68.8%  | 41:57 h | 64.6%  | 42:23 h | 67.3%  | 39:27 h | 65.8%  | 40:50 h | 68.6%  | ±01:23 h | ±1.8% |
|              | <b>0084</b> | 43:30 h | 69.6%  | 42:18 h | 65.1%  | 42:55 h | 68.1%  | 39:48 h | 66.3%  | 41:13 h | 69.3%  | ±01:27 h | ±1.9% |
|              | <b>0085</b> | 44:00 h | 70.4%  | 42:39 h | 65.6%  | 43:27 h | 69.0%  | 40:09 h | 66.9%  | 41:36 h | 69.9%  | ±01:32 h | ±2.0% |
|              | <b>0086</b> | 44:30 h | 71.2%  | 43:00 h | 66.2%  | 44:00 h | 69.8%  | 40:30 h | 67.5%  | 42:00 h | 70.6%  | ±01:36 h | ±2.1% |
| <b>VI-16</b> | <b>0087</b> | 45:00 h | 72.0%  | 43:30 h | 66.9%  | 44:30 h | 70.6%  | 41:00 h | 68.3%  | 42:30 h | 71.4%  | ±01:36 h | ±2.2% |
|              | <b>0088</b> | 45:30 h | 72.8%  | 44:11 h | 68.0%  | 44:58 h | 71.4%  | 41:28 h | 69.1%  | 43:00 h | 72.3%  | ±01:37 h | ±2.1% |
|              | <b>0089</b> | 46:00 h | 73.6%  | 44:53 h | 69.1%  | 45:26 h | 72.1%  | 41:56 h | 69.9%  | 43:30 h | 73.1%  | ±01:38 h | ±2.0% |
|              | <b>0090</b> | 46:30 h | 74.4%  | 45:35 h | 70.1%  | 45:55 h | 72.9%  | 42:25 h | 70.7%  | 44:00 h | 73.9%  | ±01:39 h | ±1.9% |
|              | <b>0091</b> | 47:00 h | 75.2%  | 46:16 h | 71.2%  | 46:23 h | 73.6%  | 42:53 h | 71.5%  | 44:30 h | 74.8%  | ±01:41 h | ±1.8% |
|              | <b>0092</b> | 47:30 h | 76.0%  | 46:58 h | 72.3%  | 46:51 h | 74.4%  | 43:21 h | 72.3%  | 45:00 h | 75.6%  | ±01:43 h | ±1.8% |
|              | <b>0093</b> | 48:00 h | 76.8%  | 47:40 h | 73.3%  | 47:20 h | 75.1%  | 43:50 h | 73.1%  | 45:30 h | 76.5%  | ±01:45 h | ±1.7% |
|              | <b>0094</b> | 48:30 h | 77.6%  | 48:21 h | 74.4%  | 47:48 h | 75.9%  | 44:18 h | 73.8%  | 46:00 h | 77.3%  | ±01:48 h | ±1.7% |
|              | <b>0095</b> | 49:00 h | 78.4%  | 49:03 h | 75.5%  | 48:16 h | 76.6%  | 44:46 h | 74.6%  | 46:30 h | 78.2%  | ±01:50 h | ±1.6% |
|              | <b>0096</b> | 49:30 h | 79.2%  | 49:45 h | 76.5%  | 48:45 h | 77.4%  | 45:15 h | 75.4%  | 47:00 h | 79.0%  | ±01:53 h | ±1.6% |
|              | <b>0097</b> | 50:00 h | 80.0%  | 50:26 h | 77.6%  | 49:13 h | 78.1%  | 45:43 h | 76.2%  | 47:30 h | 79.8%  | ±01:57 h | ±1.6% |
|              | <b>0098</b> | 50:30 h | 80.8%  | 51:08 h | 78.7%  | 49:41 h | 78.9%  | 46:11 h | 77.0%  | 48:00 h | 80.7%  | ±02:00 h | ±1.6% |
|              | <b>0099</b> | 51:00 h | 81.6%  | 51:50 h | 79.7%  | 50:10 h | 79.6%  | 46:40 h | 77.8%  | 48:30 h | 81.5%  | ±02:03 h | ±1.6% |
|              | <b>0100</b> | 51:30 h | 82.4%  | 52:31 h | 80.8%  | 50:38 h | 80.4%  | 47:08 h | 78.6%  | 49:00 h | 82.4%  | ±02:07 h | ±1.6% |
|              | <b>0101</b> | 52:00 h | 83.2%  | 53:13 h | 81.9%  | 51:06 h | 81.1%  | 47:36 h | 79.4%  | 49:30 h | 83.2%  | ±02:11 h | ±1.6% |
|              | <b>0102</b> | 52:30 h | 84.0%  | 53:55 h | 82.9%  | 51:35 h | 81.9%  | 48:05 h | 80.1%  | 50:00 h | 84.0%  | ±02:15 h | ±1.6% |
|              | <b>0103</b> | 53:00 h | 84.8%  | 54:36 h | 84.0%  | 52:03 h | 82.6%  | 48:33 h | 80.9%  | 50:30 h | 84.9%  | ±02:19 h | ±1.7% |
|              | <b>0104</b> | 53:30 h | 85.6%  | 55:18 h | 85.1%  | 52:31 h | 83.4%  | 49:01 h | 81.7%  | 51:00 h | 85.7%  | ±02:23 h | ±1.7% |
|              | <b>0105</b> | 54:00 h | 86.4%  | 56:00 h | 86.2%  | 53:00 h | 84.1%  | 49:30 h | 82.5%  | 51:30 h | 86.6%  | ±02:27 h | ±1.8% |
| <b>VI-17</b> | <b>0106</b> | 54:30 h | 87.2%  | 56:30 h | 86.9%  | 53:30 h | 84.9%  | 50:00 h | 83.3%  | 52:00 h | 87.4%  | ±02:27 h | ±1.8% |
|              | <b>0107</b> | 55:00 h | 88.0%  | 57:02 h | 87.7%  | 54:06 h | 85.9%  | 50:38 h | 84.4%  | 52:28 h | 88.2%  | ±02:26 h | ±1.7% |
|              | <b>0108</b> | 55:30 h | 88.8%  | 57:34 h | 88.6%  | 54:42 h | 86.8%  | 51:16 h | 85.4%  | 52:56 h | 89.0%  | ±02:24 h | ±1.5% |
|              | <b>0109</b> | 56:00 h | 89.6%  | 58:06 h | 89.4%  | 55:18 h | 87.8%  | 51:54 h | 86.5%  | 53:24 h | 89.7%  | ±02:23 h | ±1.4% |
|              | <b>0110</b> | 56:30 h | 90.4%  | 58:38 h | 90.2%  | 55:54 h | 88.7%  | 52:32 h | 87.6%  | 53:52 h | 90.5%  | ±02:22 h | ±1.3% |
|              | <b>0111</b> | 57:00 h | 91.2%  | 59:10 h | 91.0%  | 56:30 h | 89.7%  | 53:10 h | 88.6%  | 54:20 h | 91.3%  | ±02:20 h | ±1.2% |
|              | <b>0112</b> | 57:30 h | 92.0%  | 59:42 h | 91.8%  | 57:06 h | 90.6%  | 53:48 h | 89.7%  | 54:48 h | 92.1%  | ±02:19 h | ±1.1% |
|              | <b>0113</b> | 58:00 h | 92.8%  | 60:14 h | 92.7%  | 57:42 h | 91.6%  | 54:26 h | 90.7%  | 55:16 h | 92.9%  | ±02:18 h | ±0.9% |
|              | <b>0114</b> | 58:30 h | 93.6%  | 60:46 h | 93.5%  | 58:18 h | 92.5%  | 55:04 h | 91.8%  | 55:44 h | 93.7%  | ±02:18 h | ±0.8% |
|              | <b>0115</b> | 59:00 h | 94.4%  | 61:18 h | 94.3%  | 58:54 h | 93.5%  | 55:42 h | 92.8%  | 56:12 h | 94.5%  | ±02:17 h | ±0.7% |
|              | <b>0116</b> | 59:30 h | 95.2%  | 61:50 h | 95.1%  | 59:30 h | 94.4%  | 56:20 h | 93.9%  | 56:40 h | 95.2%  | ±02:16 h | ±0.6% |
|              | <b>0117</b> | 60:00 h | 96.0%  | 62:22 h | 95.9%  | 60:06 h | 95.4%  | 56:58 h | 94.9%  | 57:08 h | 96.0%  | ±02:16 h | ±0.5% |
|              | <b>0118</b> | 60:30 h | 96.8%  | 62:54 h | 96.8%  | 60:42 h | 96.3%  | 57:36 h | 96.0%  | 57:36 h | 96.8%  | ±02:16 h | ±0.4% |
|              | <b>0119</b> | 61:00 h | 97.6%  | 63:26 h | 97.6%  | 61:18 h | 97.3%  | 58:14 h | 97.1%  | 58:04 h | 97.6%  | ±02:15 h | ±0.2% |
|              | <b>0120</b> | 61:30 h | 98.4%  | 63:58 h | 98.4%  | 61:54 h | 98.3%  | 58:52 h | 98.1%  | 58:32 h | 98.4%  | ±02:15 h | ±0.1% |
|              | <b>0121</b> | 62:00 h | 99.2%  | 64:30 h | 99.2%  | 62:30 h | 99.2%  | 59:30 h | 99.2%  | 59:00 h | 99.2%  | ±02:23 h | ±0.0% |
| <b>Hatch</b> | <b>0122</b> | 62:30 h | 100.0% | 65:00 h | 100.0% | 63:00 h | 100.0% | 60:00 h | 100.0% | 59:30 h | 100.0% | ±02:15 h | ±0.0% |



## Supplementary Videos

**Supplementary Video 1 – Medfly embryonic development for the six *in toto* datasets (DS0001–DS0006) along four orientations from 02:00 h to 64:30 h of absolute development time with an interval of 30 min between the time points.** The video starts at the onset of stage I-2, when the nuclei move to the surface of the egg and stops at the end of stage VI-17, when larvae hatch. It shows six embryogenetic events: (I) blastoderm formation, (II) early gastrulation, (III) germband elongation, (IV) germband retraction, (V) dorsal closure and (VI) muscular movement. Frame rate is five frames per second. Embryos from DS0001 and DS0003 are shown along the ventrolateral, dorsolateral, dorsolateral, and ventrolateral orientations, embryos from DS0002 and DS0004–DS0006 are shown along the ventral, lateral, dorsal, and lateral orientations. ZA,  $z$  maximum projection with image adjustment.
